# Supplementary material
Source: MDPI journal article supplement (https://www.mdpi.com/2072-4292/12/11/1840)

# Camera 1, 12 GCPs and angle $A_1$

Sets of points

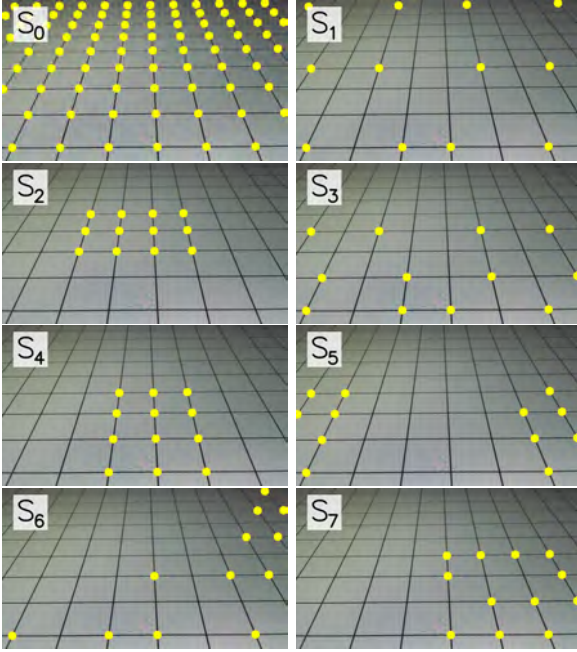

Errors  $\epsilon_P$

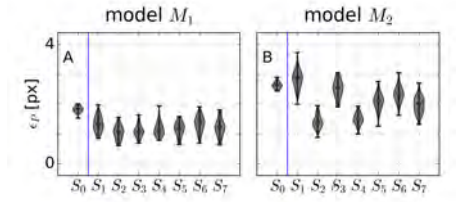

Errors  $\epsilon_Q$  and  $\epsilon_G$

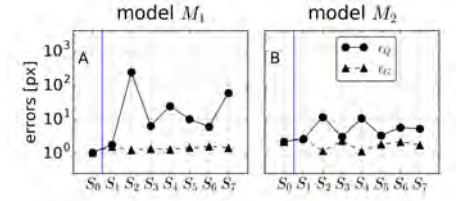

Intrinsic:  $k_{1\star}$  and  $s_{c\star}$

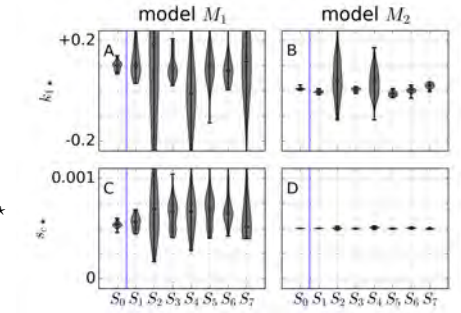

Errors  $\tilde{\epsilon}$  for model  $M_1$  (left panels) and model  $M_2$  (right panels)

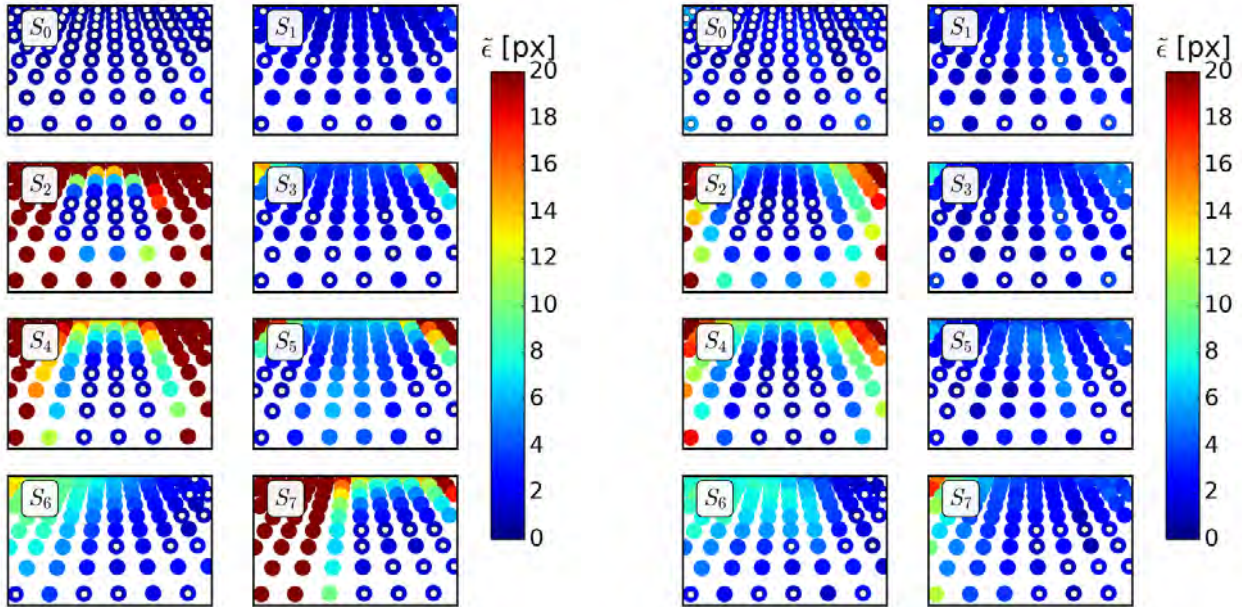

## Camera 1, 12 GCPs and angle $A_2$

Sets of points

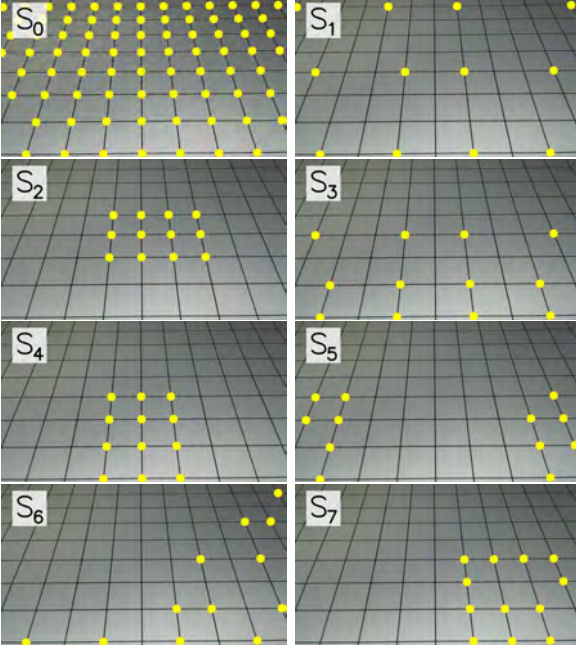

Errors  $\epsilon_P$

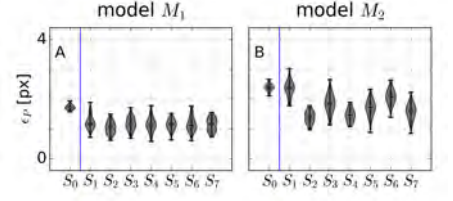

Errors  $\epsilon_Q$  and  $\epsilon_G$

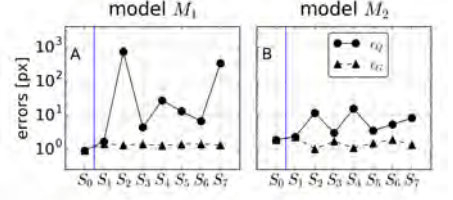

Intrinsic:  $k_{1\star}$  and  $s_{c\star}$

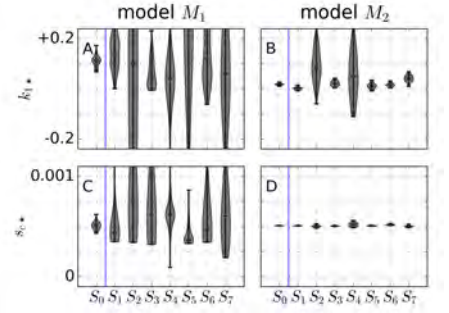

Errors  $\tilde{\epsilon}$  for model  $M_1$  (left panels) and model  $M_2$  (right panels)

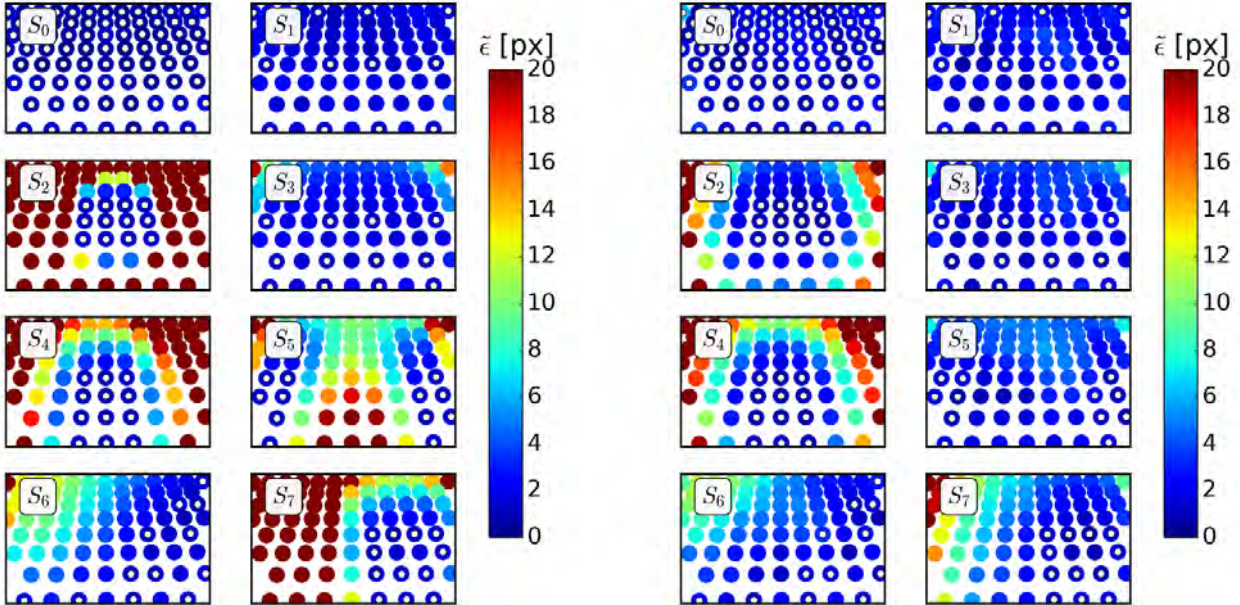



# Camera 1, 12 GCPs and angle $A_3$

Sets of points

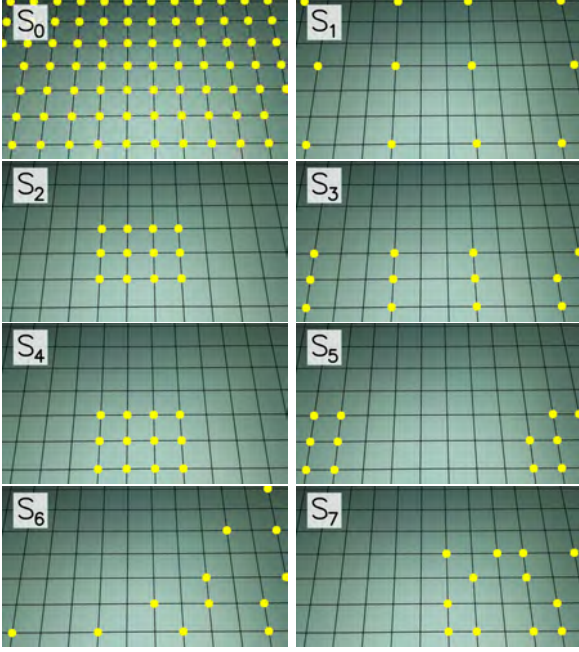

Errors  $\epsilon_P$

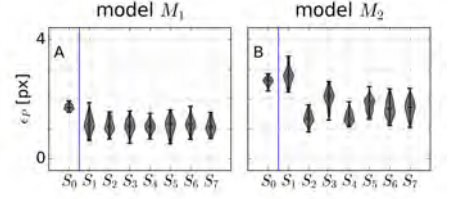

Errors  $\epsilon_Q$  and  $\epsilon_G$

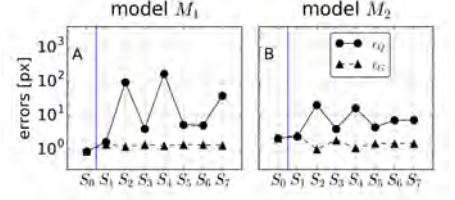

Intrinsic:  $k_{1\star}$  and  $s_{c\star}$

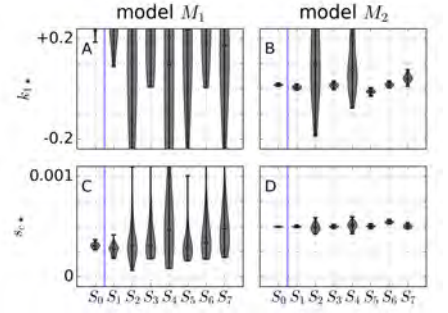

Errors  $\tilde{\epsilon}$  for model  $M_1$  (left panels) and model  $M_2$  (right panels)

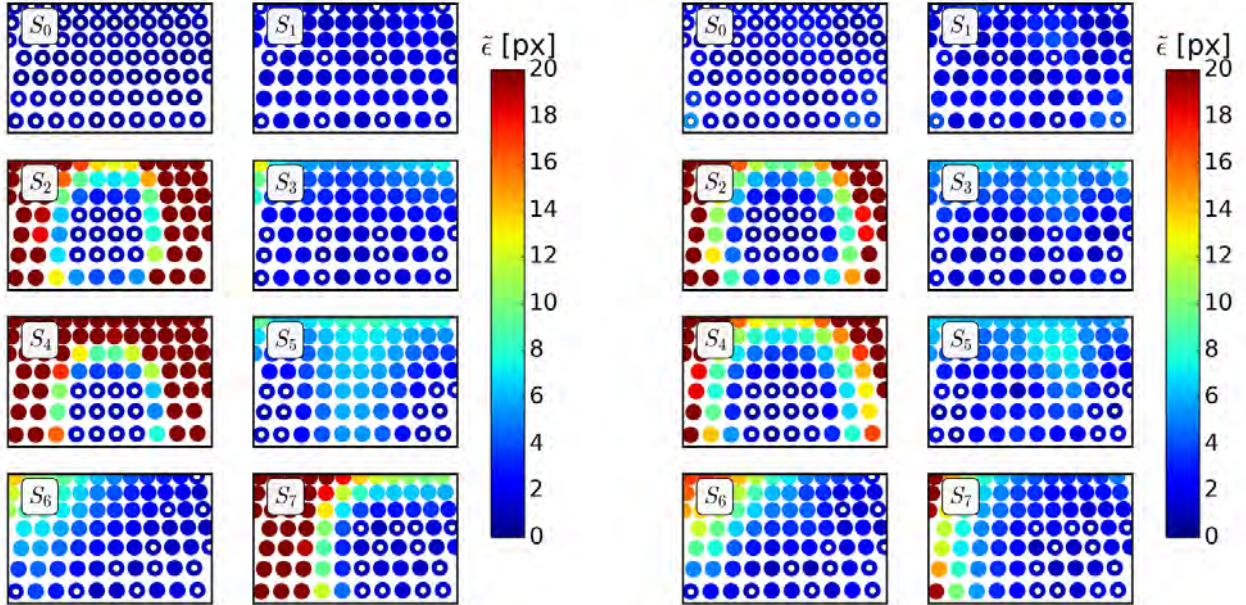

## Camera 1, 12 GCPs ( $A_1$ , $A_2$ and $A_3$ )

Extrinsic: eulerian angles for  $M_1$

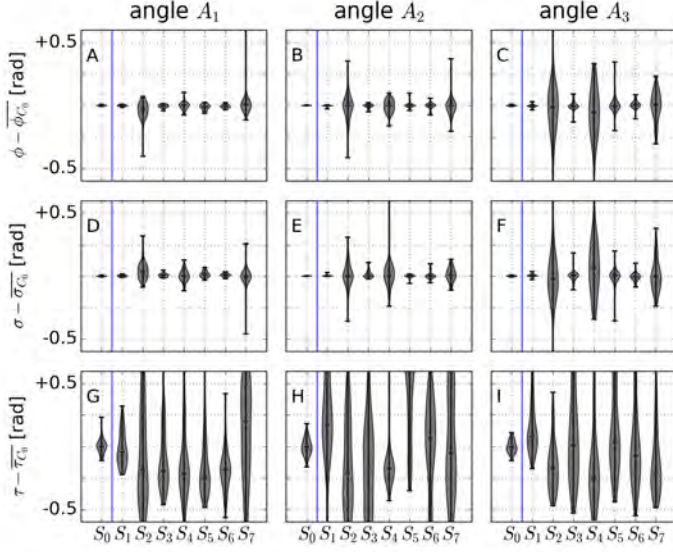

Extrinsic: eulerian angles for  $M_2$

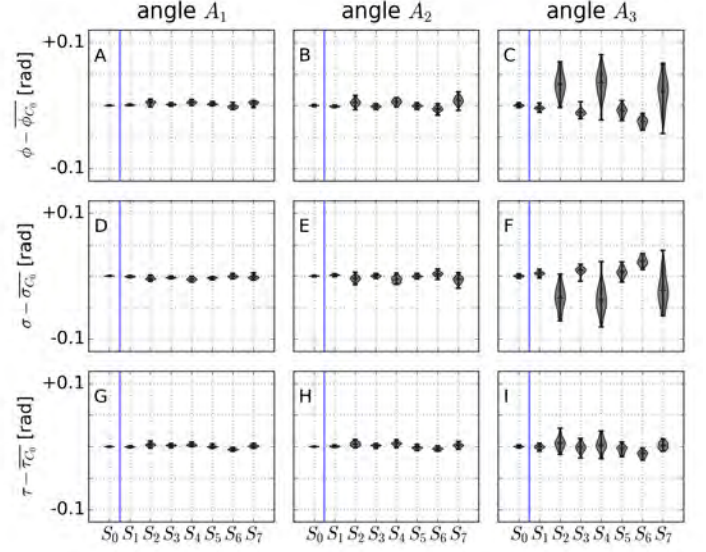

Extrinsic: camera position for  $M_1$

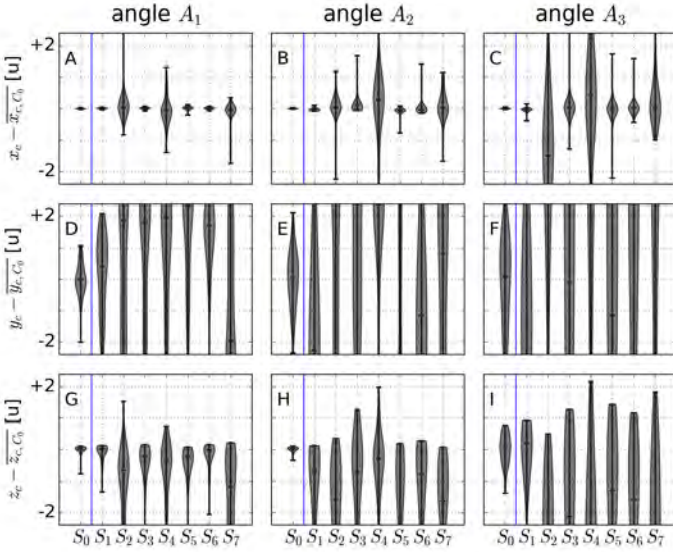

Extrinsic: camera position for  $M_2$

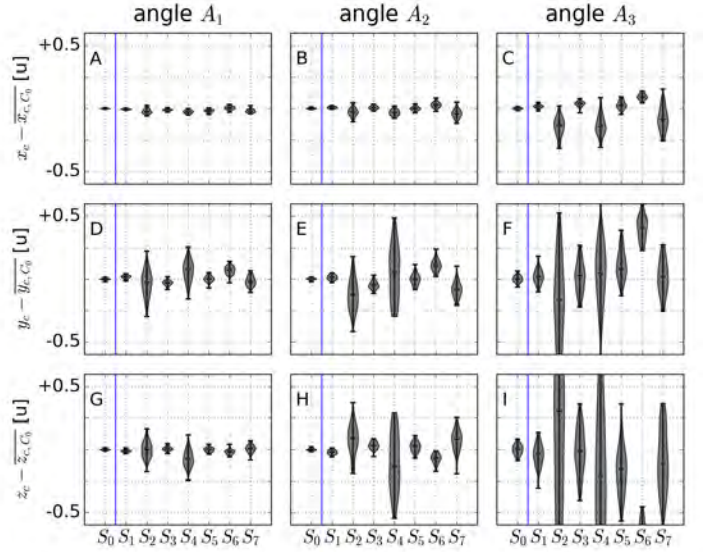



## Camera 1, 8 GCPs and angle $A_1$

Sets of points

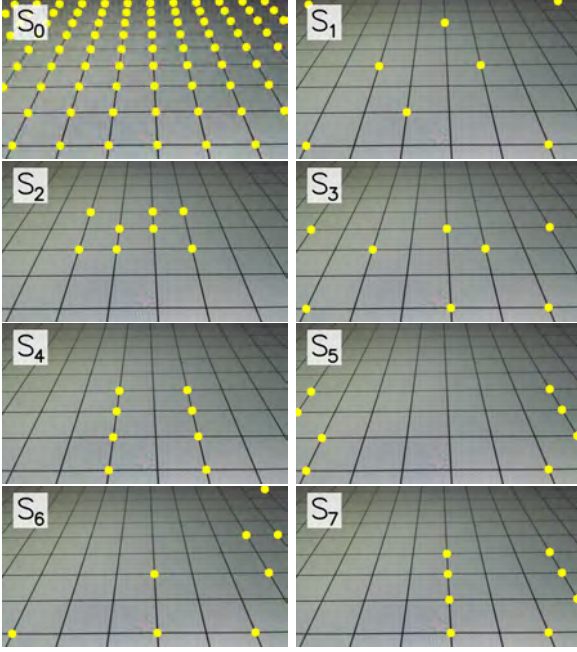

Errors  $\epsilon_P$

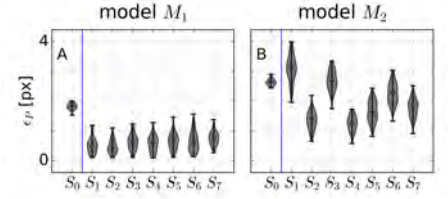

Errors  $\epsilon_Q$  and  $\epsilon_G$

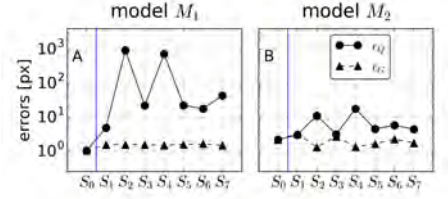

Intrinsic:  $k_{1\star}$  and  $s_{c\star}$

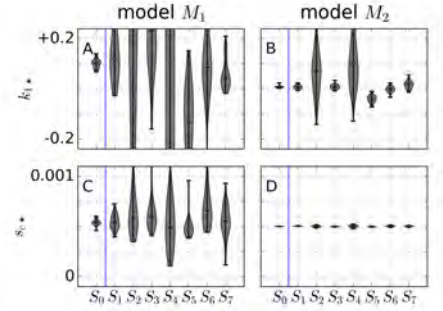

Errors  $\tilde{\epsilon}$  for model  $M_1$  (left panels) and model  $M_2$  (right panels)

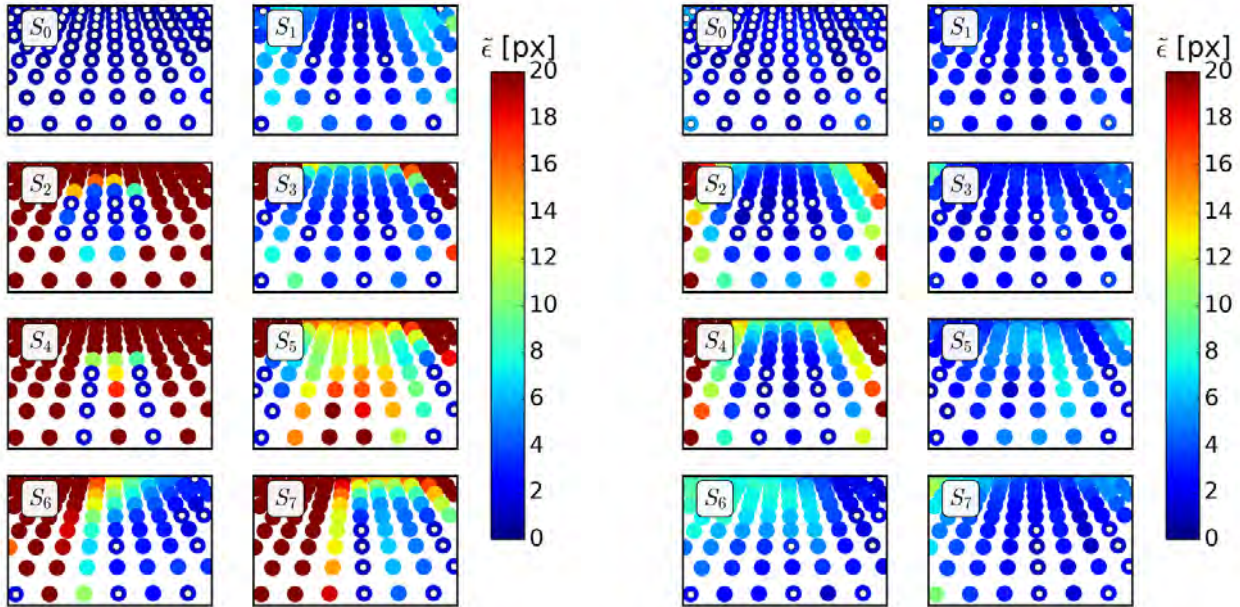

## Camera 1, 8 GCPs and angle $A_2$

Sets of points

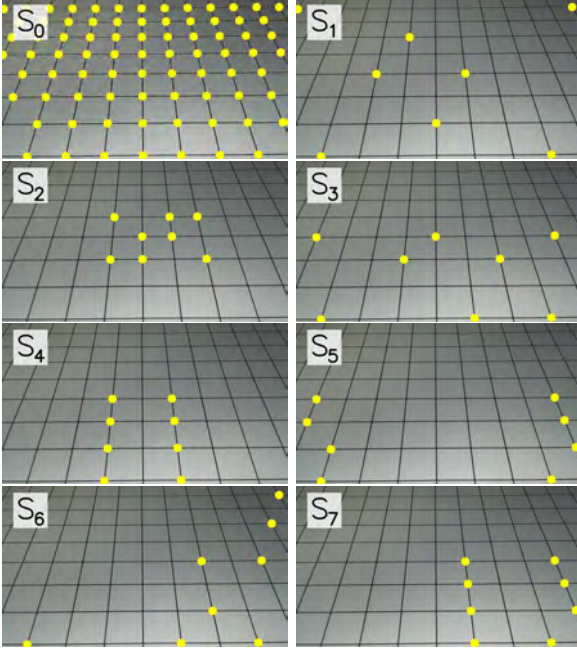

Errors  $\epsilon_P$

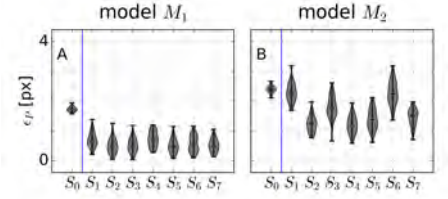

Errors  $\epsilon_Q$  and  $\epsilon_G$

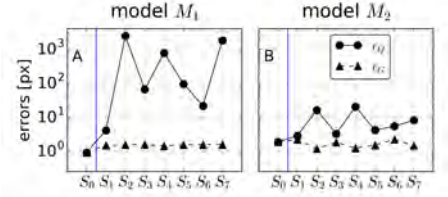

Intrinsic:  $k_{1\star}$  and  $s_{c\star}$

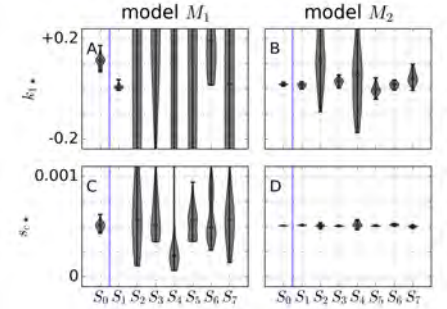

Errors  $\tilde{\epsilon}$  for model  $M_1$  (left panels) and model  $M_2$  (right panels)

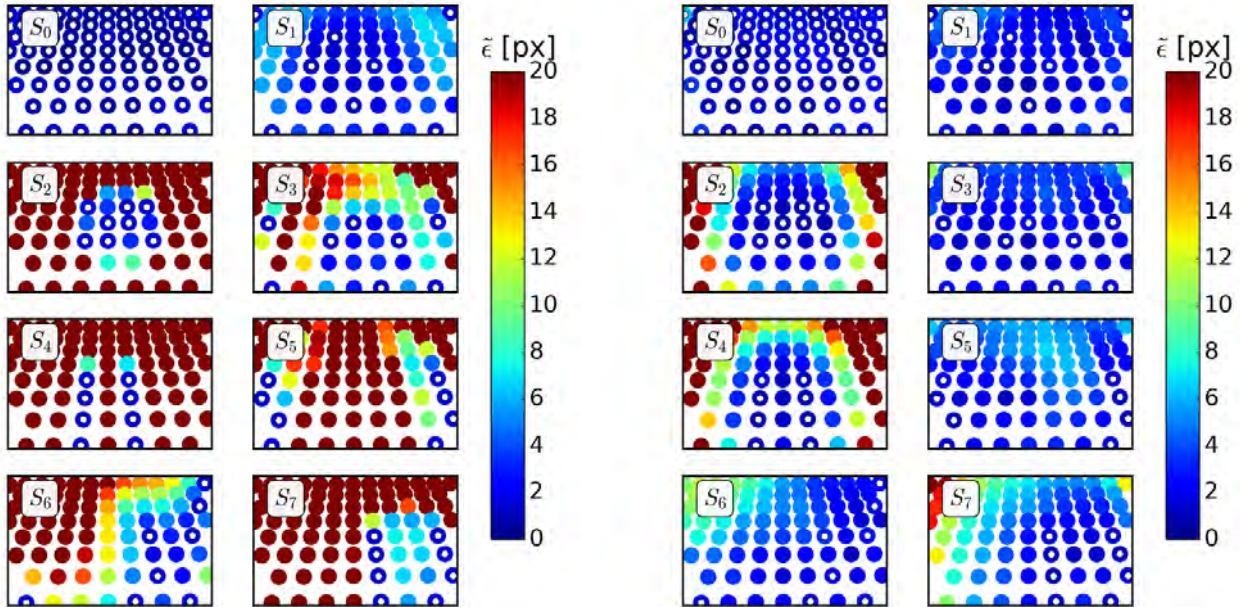



## Camera 1, 8 GCPs and angle $A_3$

Sets of points

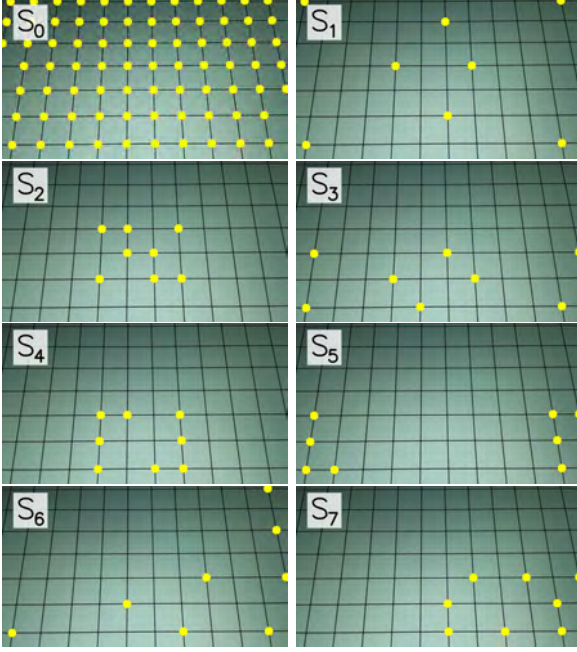

Errors  $\epsilon_P$

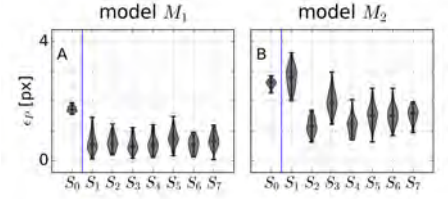

Errors  $\epsilon_Q$  and  $\epsilon_G$

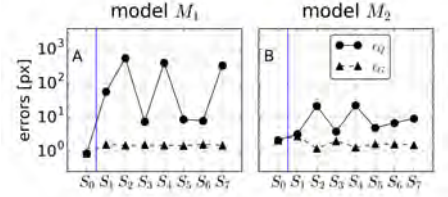

Intrinsic:  $k_{1\star}$  and  $s_{c\star}$

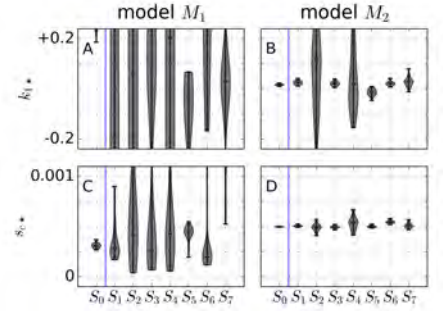

Errors  $\tilde{\epsilon}$  for model  $M_1$  (left panels) and model  $M_2$  (right panels)

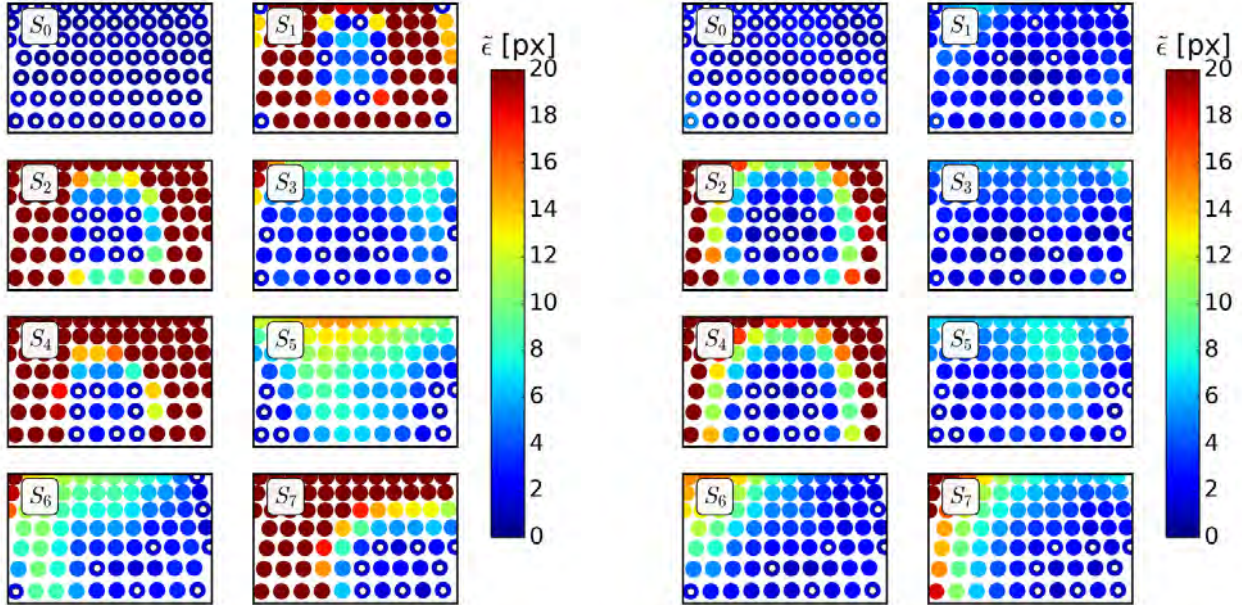

## Camera 1, 8 GCPs ( $A_1$ , $A_2$ and $A_3$ )

Extrinsic: eulerian angles for  $M_1$

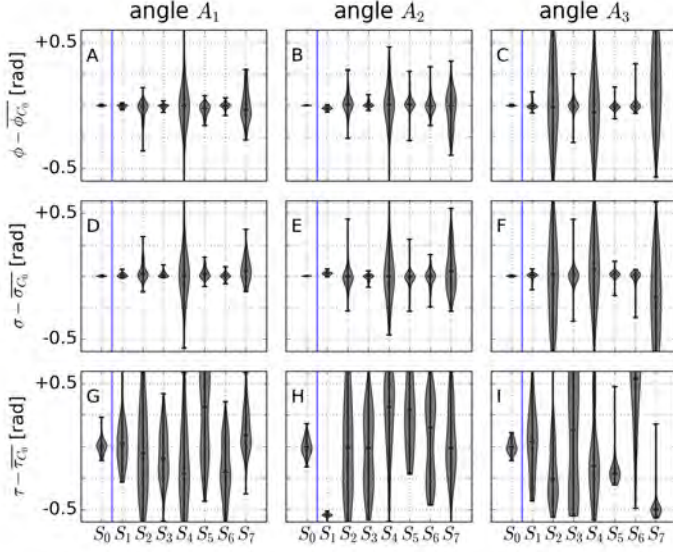

Extrinsic: eulerian angles for  $M_2$

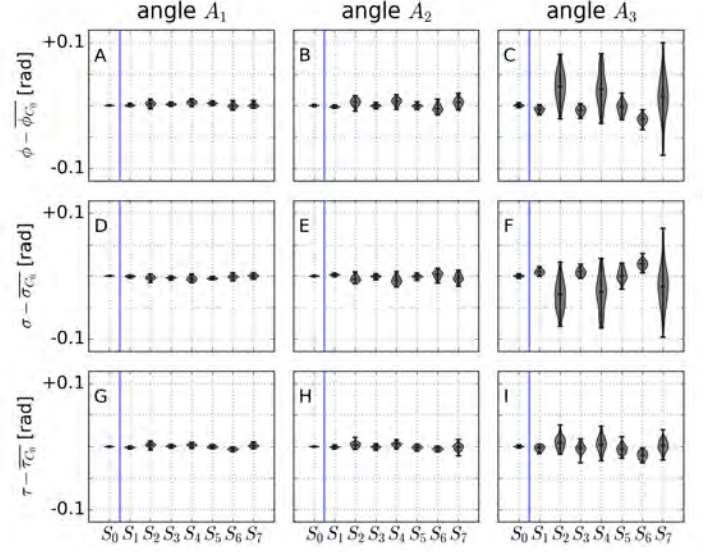

Extrinsic: camera position for  $M_1$

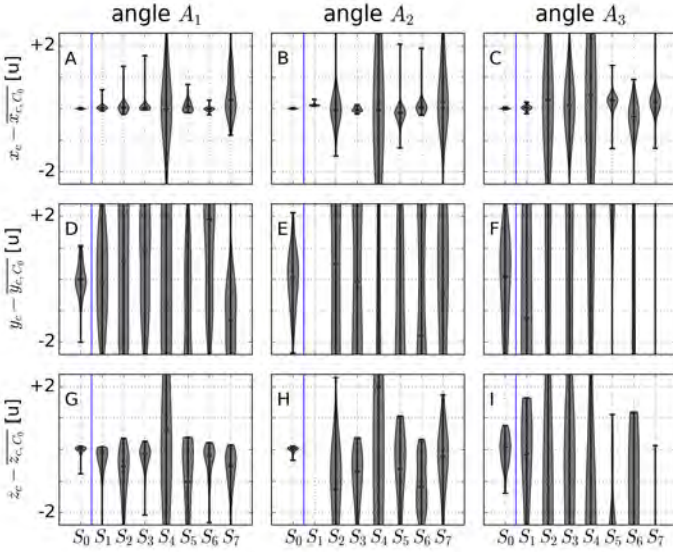

Extrinsic: camera position for  $M_2$

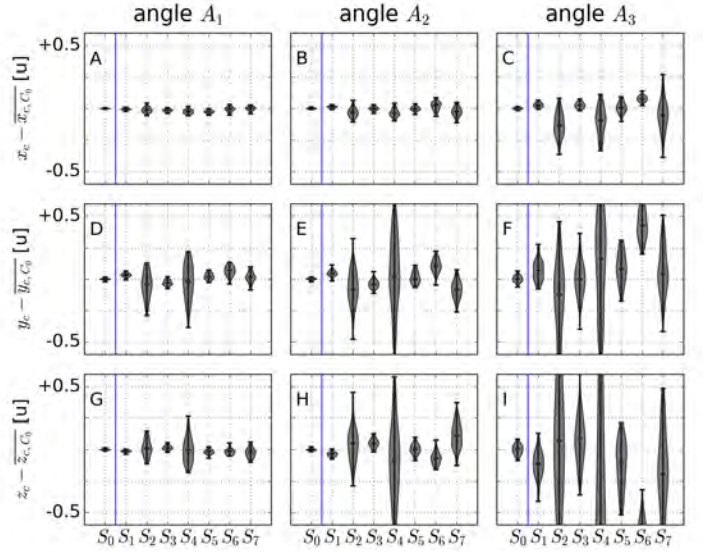



## Camera 1, 6 GCPs and angle $A_1$

Sets of points

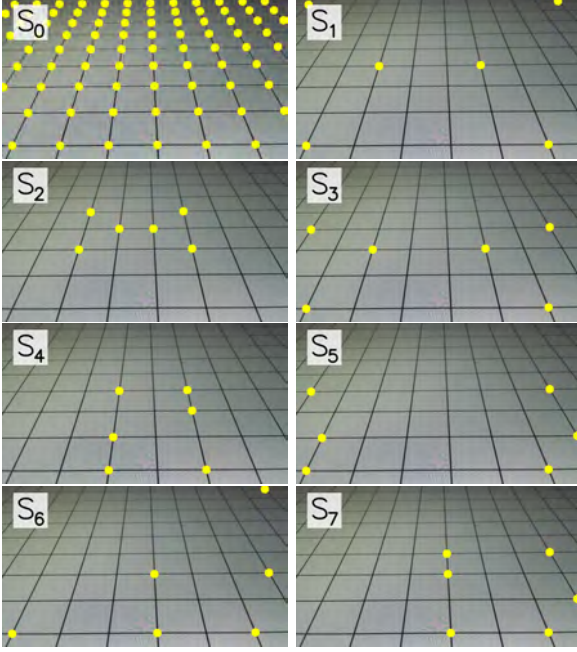

Errors  $\epsilon_P$

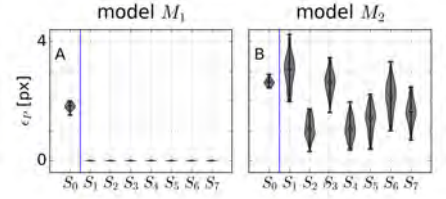

Errors  $\epsilon_Q$  and  $\epsilon_G$

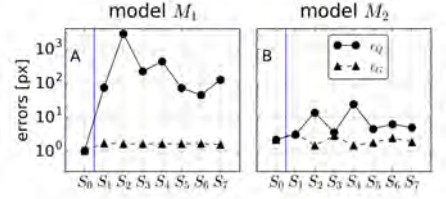

Intrinsic:  $k_{1\star}$  and  $s_{c\star}$

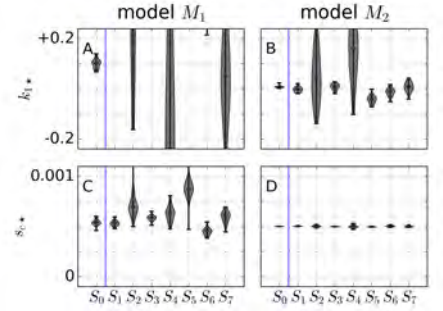

Errors  $\tilde{\epsilon}$  for model  $M_1$  (left panels) and model  $M_2$  (right panels)

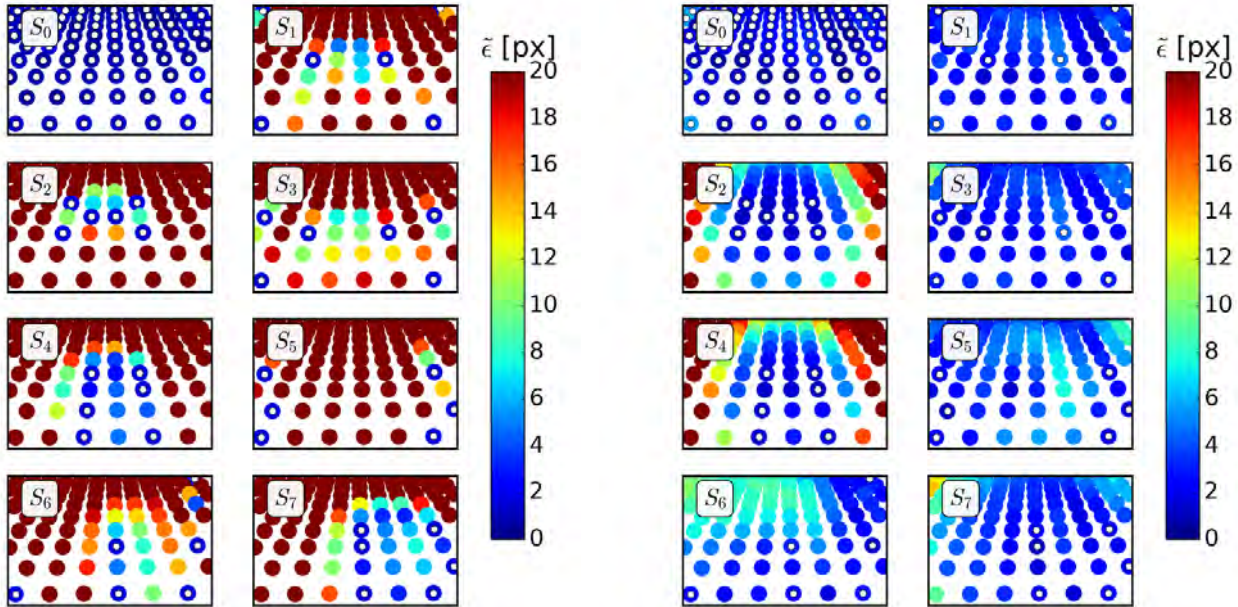

## Camera 1, 6 GCPs and angle $A_2$

Sets of points

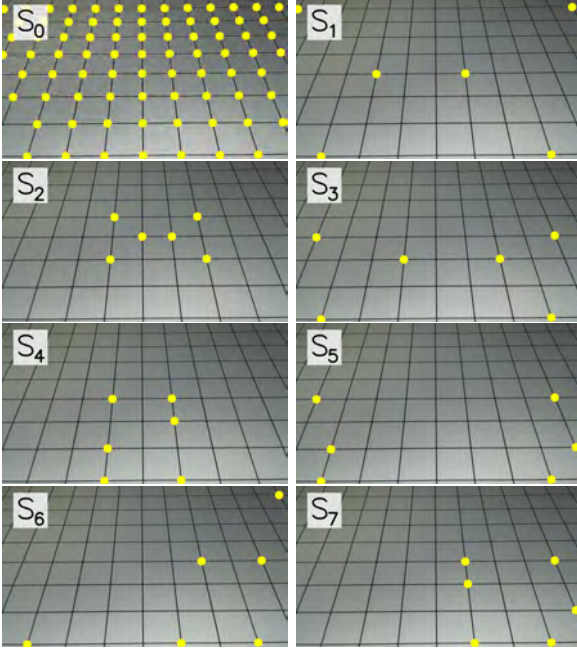

Errors  $\epsilon_P$

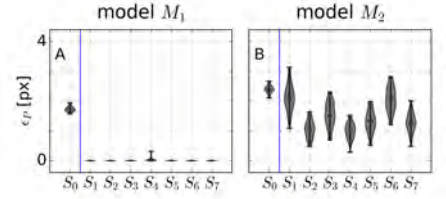

Errors  $\epsilon_Q$  and  $\epsilon_G$

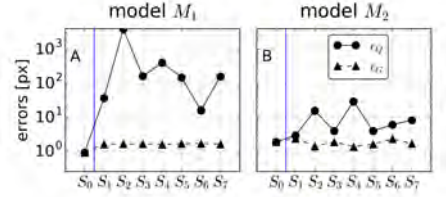

Intrinsic:  $k_{1\star}$  and  $s_{c\star}$

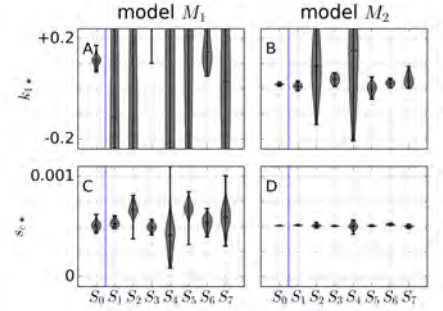

Errors  $\tilde{\epsilon}$  for model  $M_1$  (left panels) and model  $M_2$  (right panels)

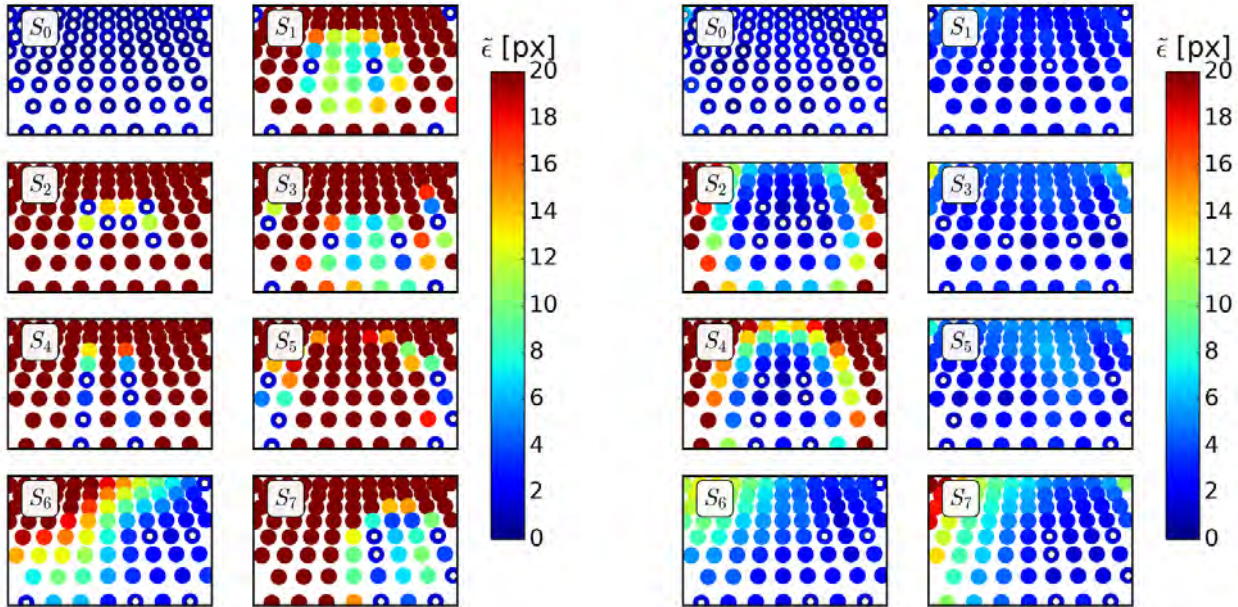



## Camera 1, 6 GCPs and angle $A_3$

Sets of points

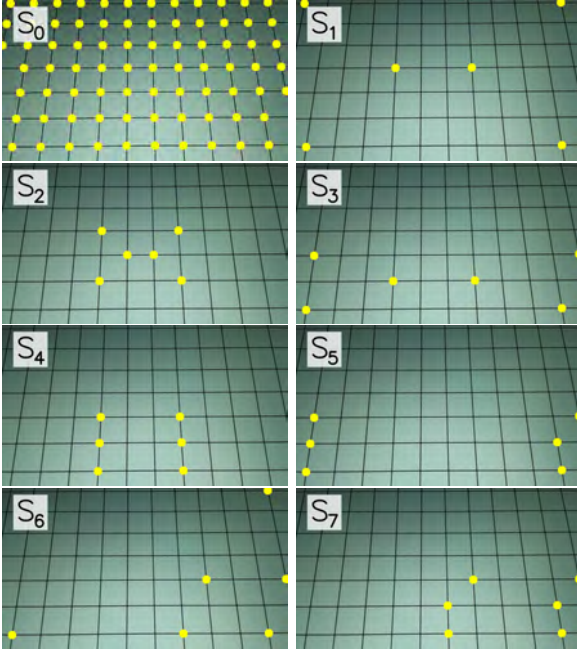

Errors  $\epsilon_P$

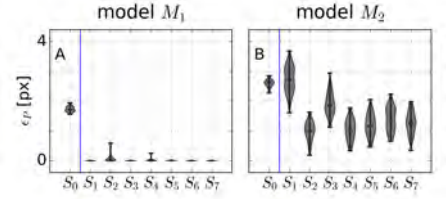

Errors  $\epsilon_Q$  and  $\epsilon_G$

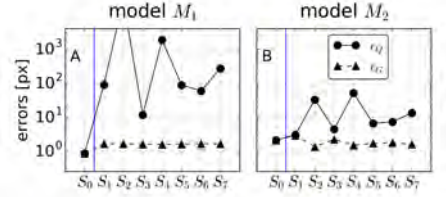

Intrinsic:  $k_{1\star}$  and  $s_{c\star}$

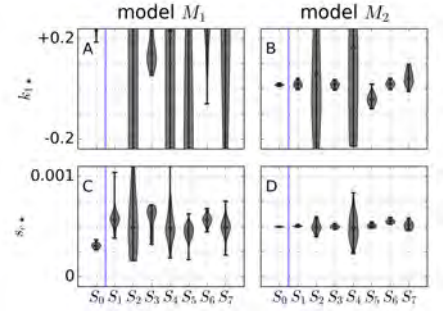

Errors  $\tilde{\epsilon}$  for model  $M_1$  (left panels) and model  $M_2$  (right panels)

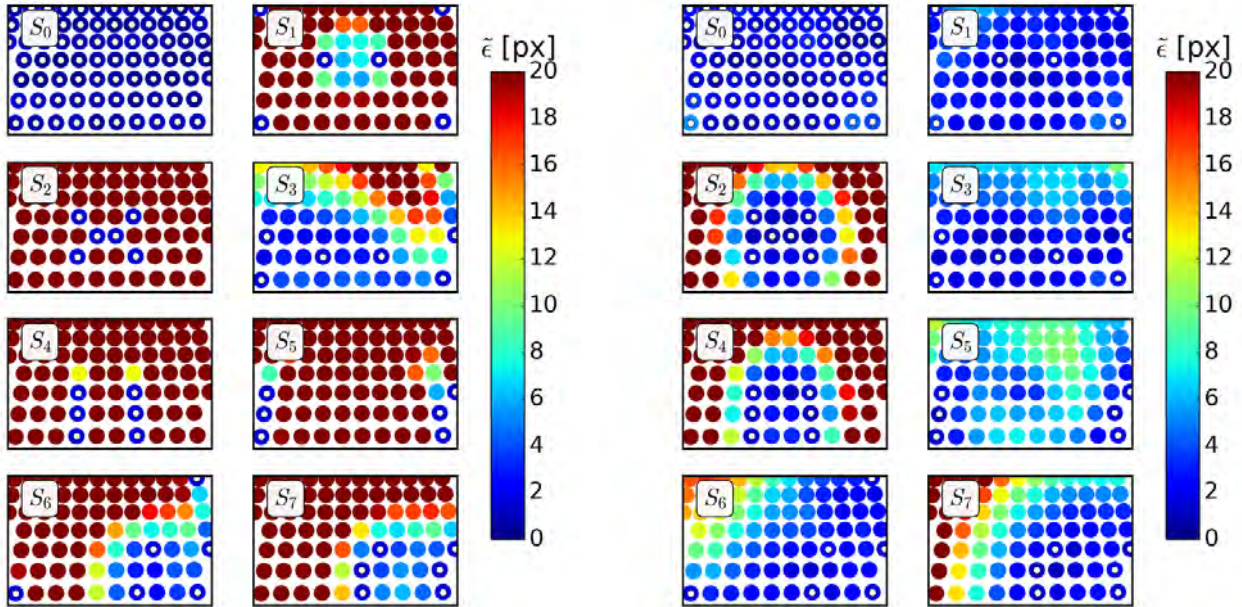

## Camera 1, 6 GCPs ( $A_1$ , $A_2$ and $A_3$ )

Extrinsic: eulerian angles for  $M_1$

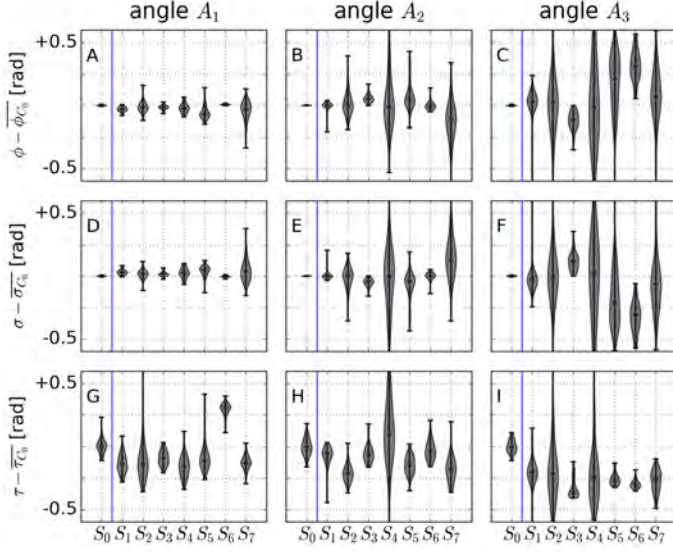

Extrinsic: eulerian angles for  $M_2$

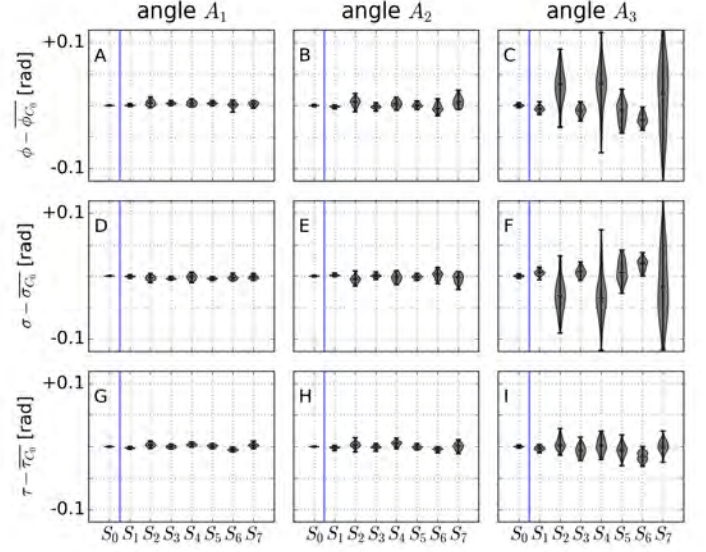

Extrinsic: camera position for  $M_1$

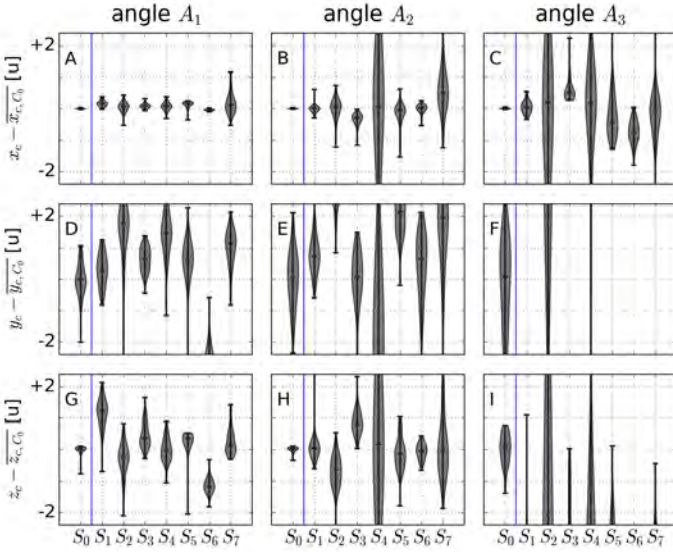

Extrinsic: camera position for  $M_2$

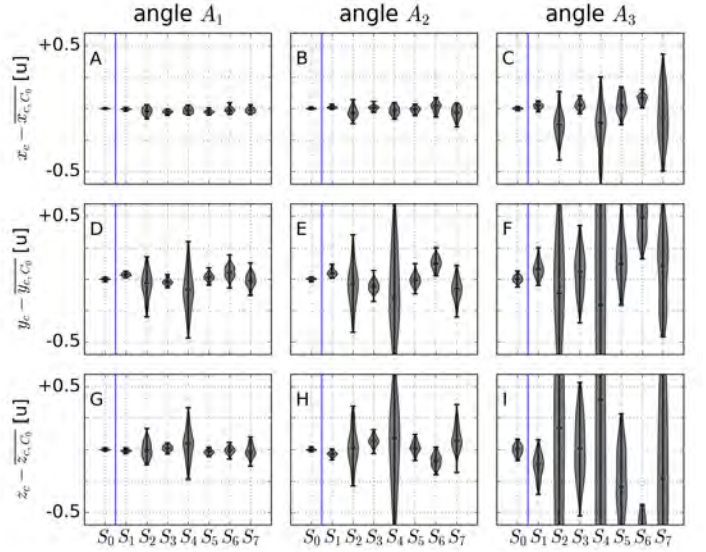



## Camera 2, 12 GCPs and angle $A_1$

Sets of points

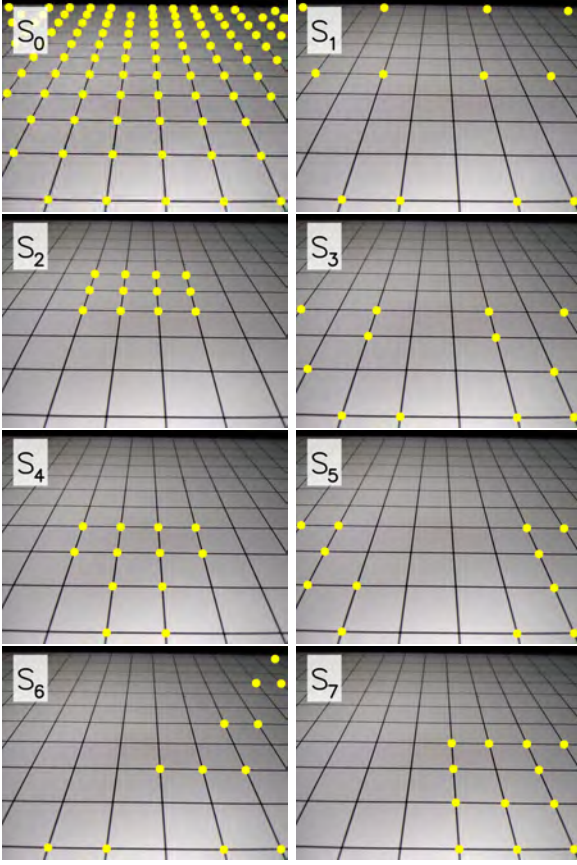

Errors  $\epsilon_P$

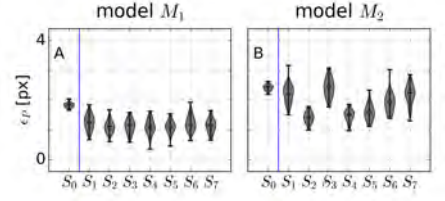

Errors  $\epsilon_Q$  and  $\epsilon_G$

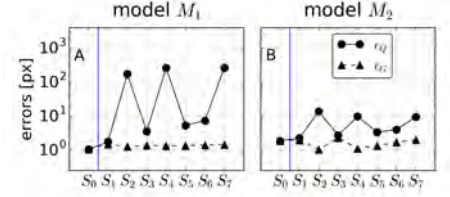

Intrinsic:  $k_{1*}$  and  $s_{c*}$

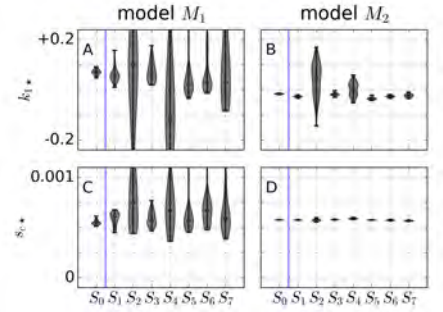

Errors  $\tilde{\epsilon}$  for model  $M_1$  (left panels) and model  $M_2$  (right panels)

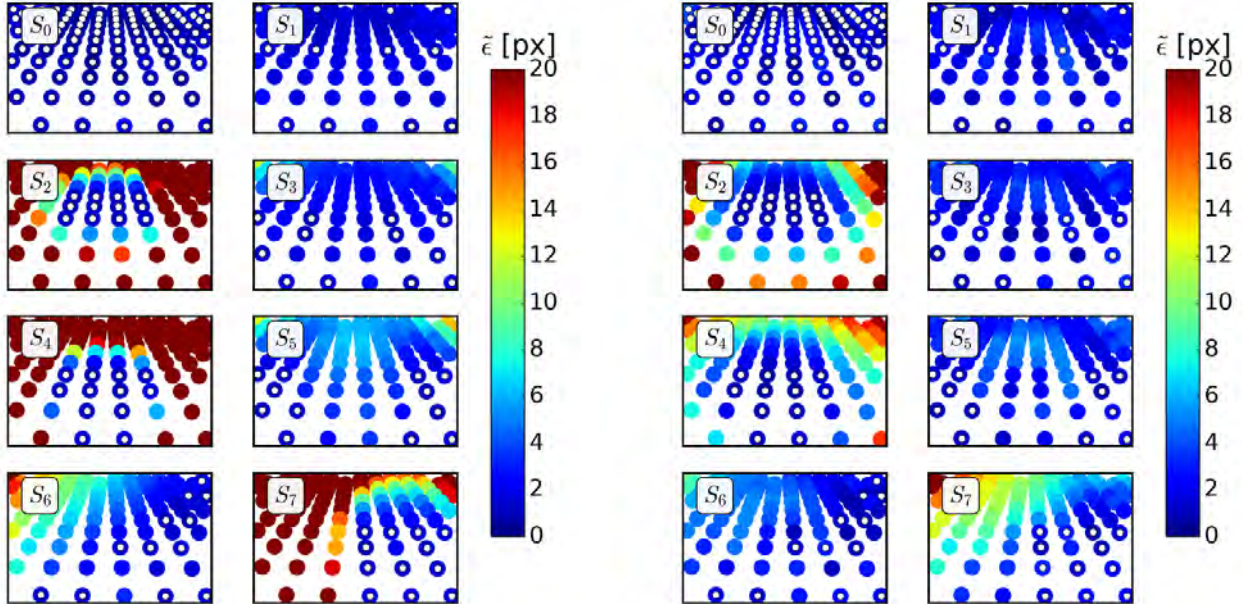



## Camera 2, 12 GCPs and angle $A_2$

Sets of points

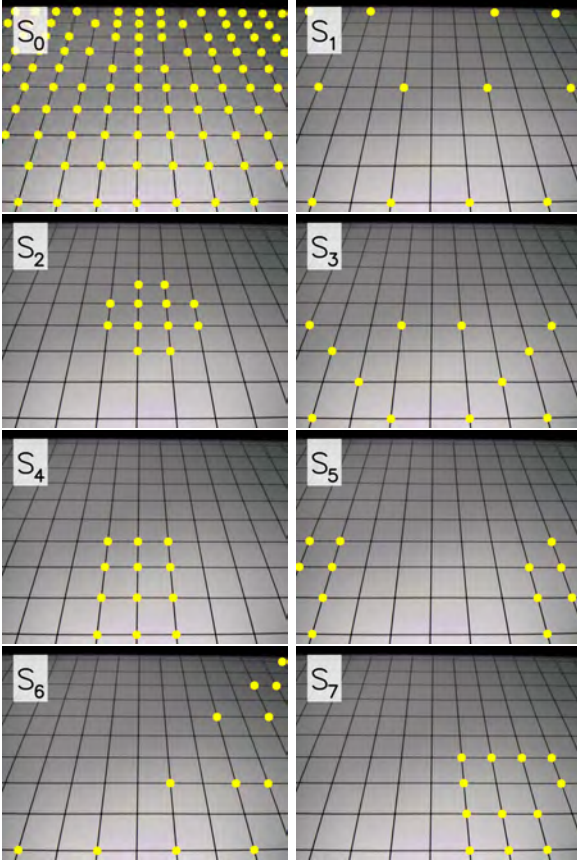

Errors  $\epsilon_P$

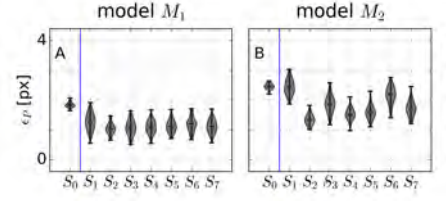

Errors  $\epsilon_Q$  and  $\epsilon_G$

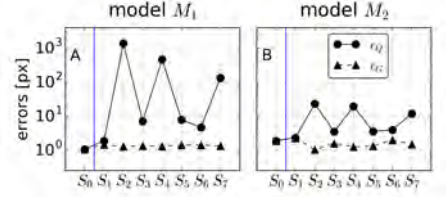

Intrinsic:  $k_{1*}$  and  $s_{c*}$

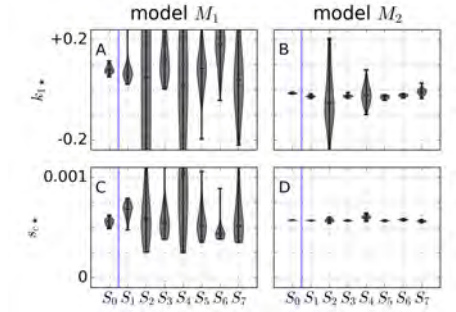

Errors  $\tilde{\epsilon}$  for model  $M_1$  (left panels) and model  $M_2$  (right panels)

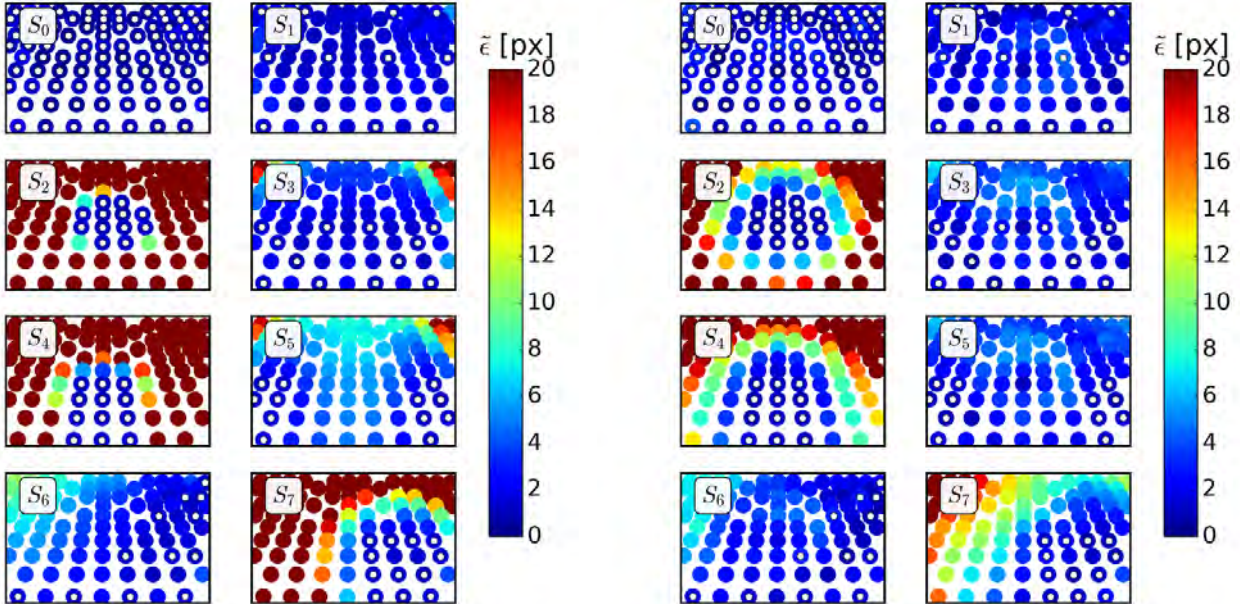



## Camera 2, 12 GCPs and angle $A_3$

Sets of points

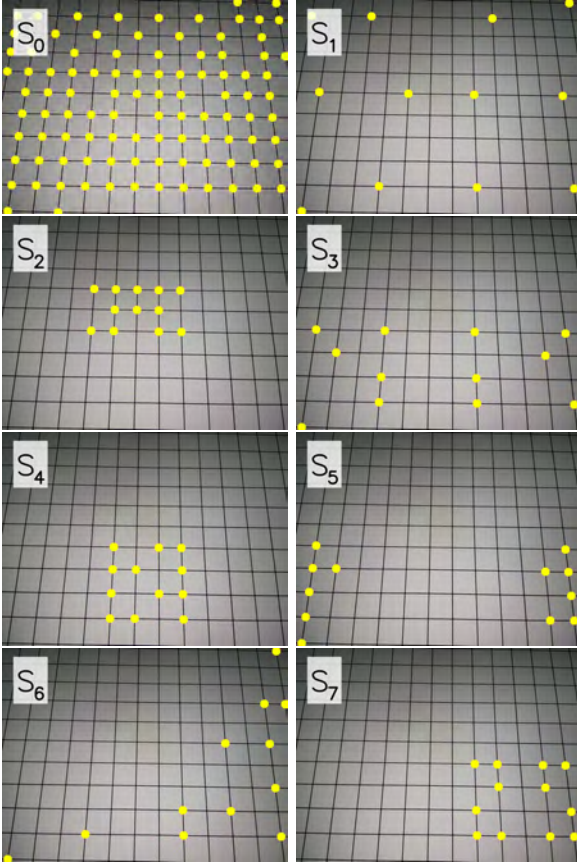

Errors  $\epsilon_P$

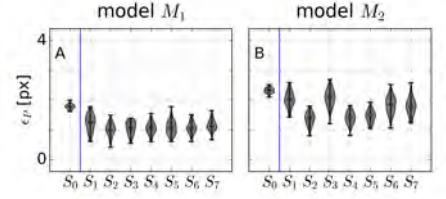

Errors  $\epsilon_Q$  and  $\epsilon_G$

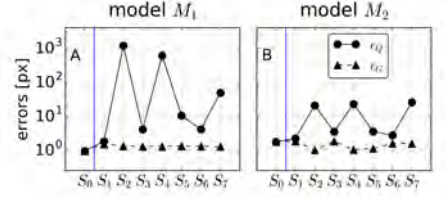

Intrinsic:  $k_{1*}$  and  $s_{c*}$

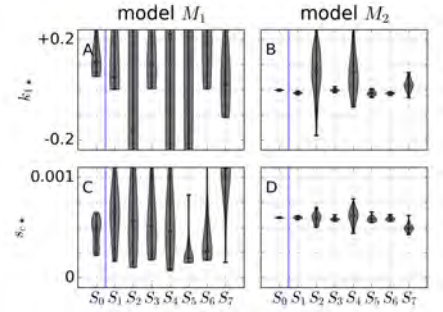

Errors  $\tilde{\epsilon}$  for model  $M_1$  (left panels) and model  $M_2$  (right panels)

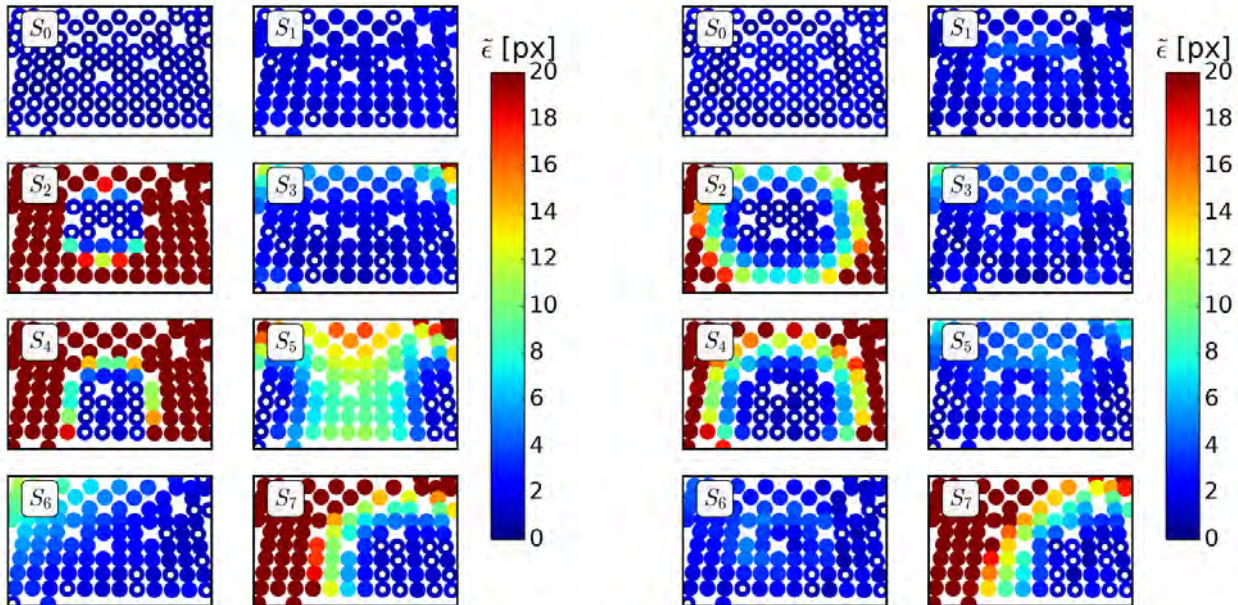

## Camera 2, 12 GCPs ( $A_1$ , $A_2$ and $A_3$ )

Extrinsic: eulerian angles for  $M_1$

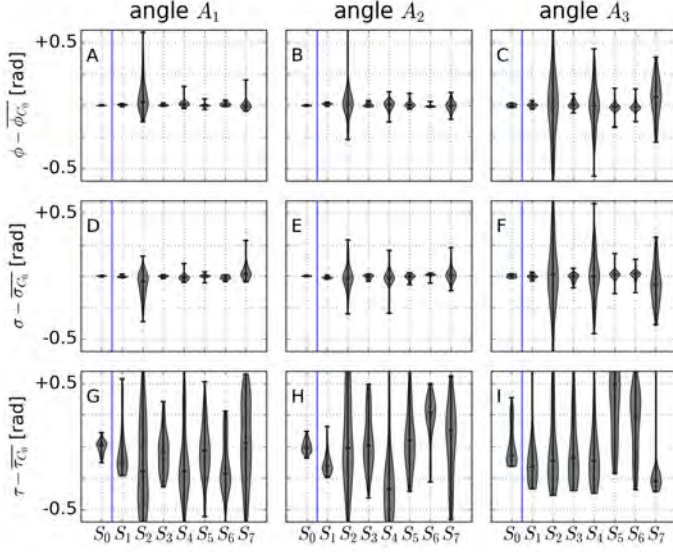

Extrinsic: eulerian angles for  $M_2$

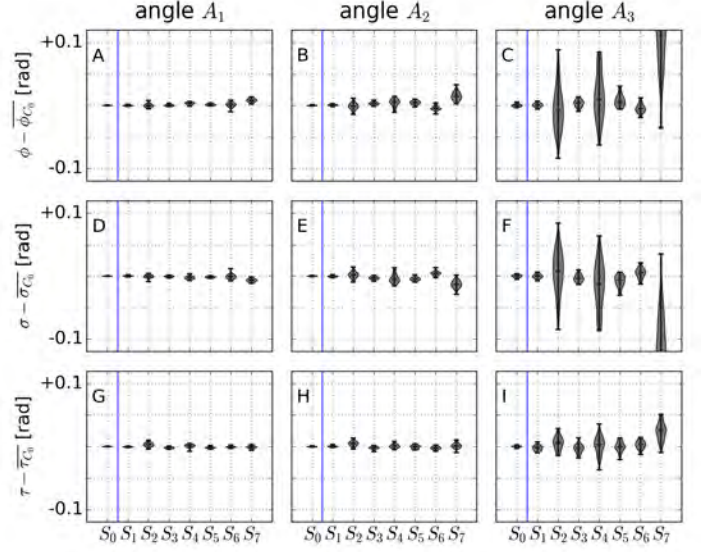

Extrinsic: camera position for  $M_1$

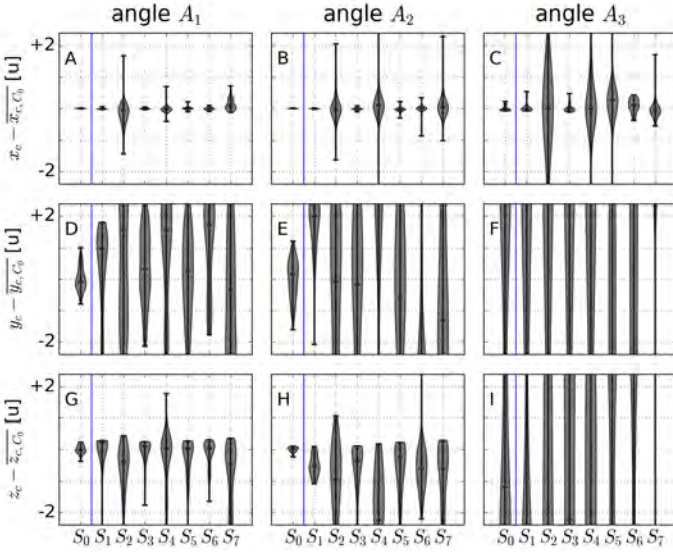

Extrinsic: camera position for  $M_2$

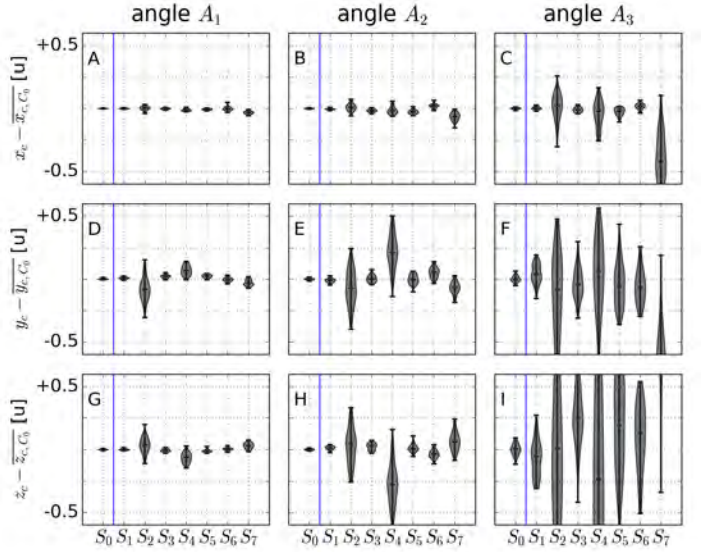



## Camera 2, 8 GCPs and angle $A_1$

Sets of points

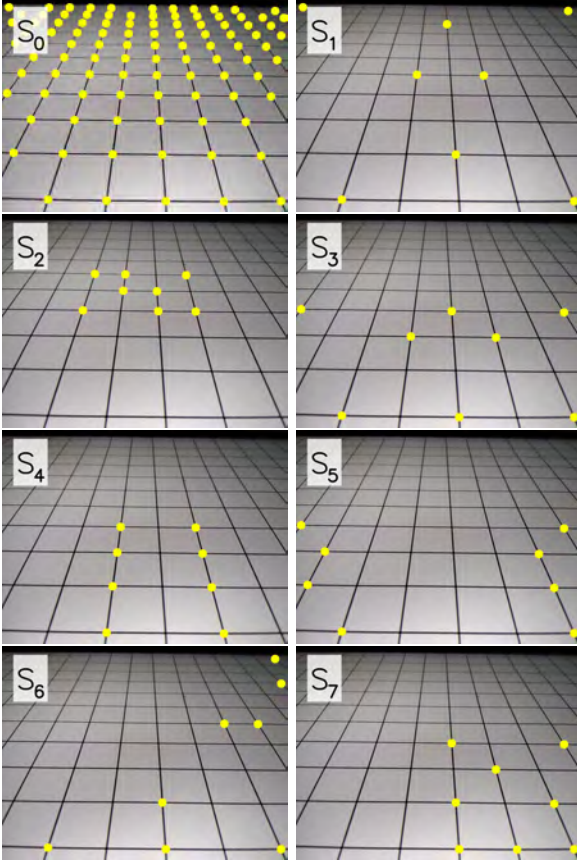

Errors  $\epsilon_P$

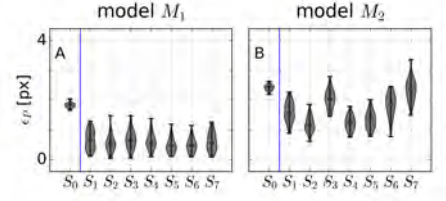

Errors  $\epsilon_Q$  and  $\epsilon_G$

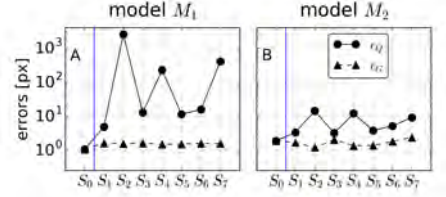

Intrinsic:  $k_{1*}$  and  $s_{c*}$

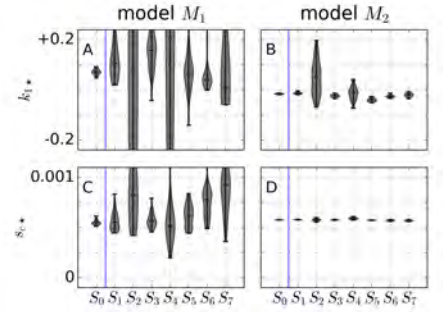

Errors  $\tilde{\epsilon}$  for model  $M_1$  (left panels) and model  $M_2$  (right panels)

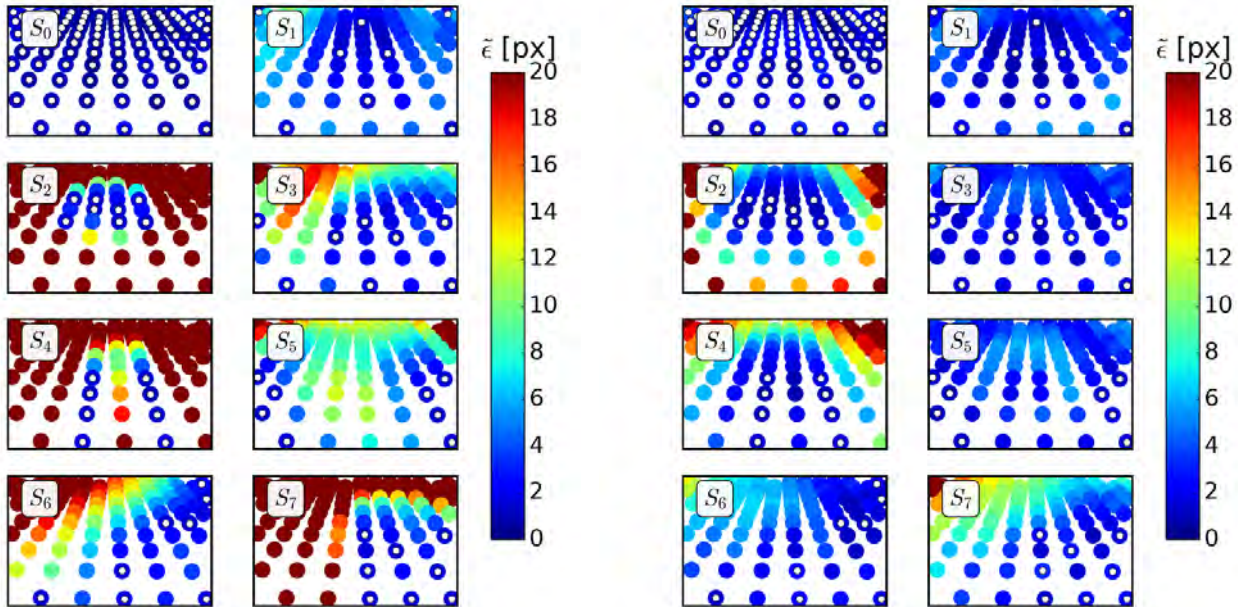

## Camera 2, 8 GCPs and angle $A_2$

Sets of points

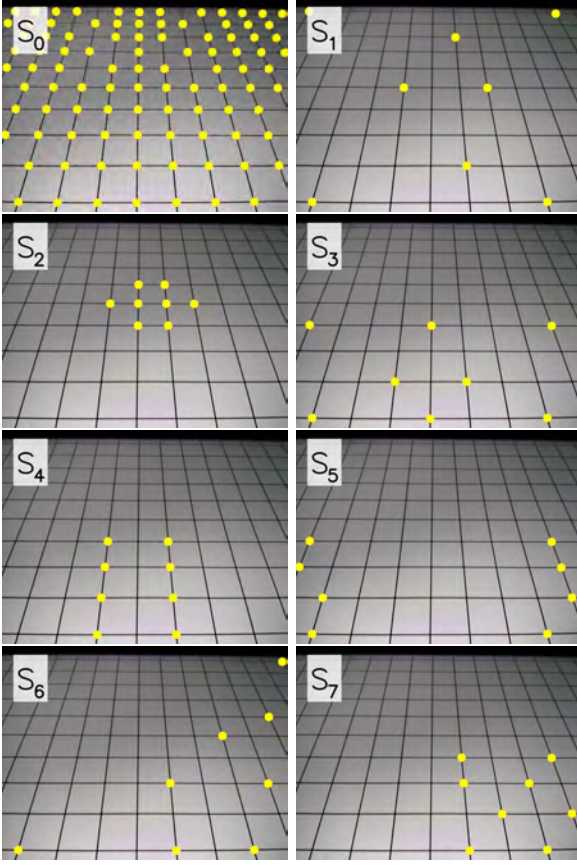

Errors  $\epsilon_P$

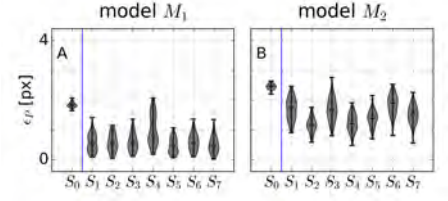

Errors  $\epsilon_Q$  and  $\epsilon_G$

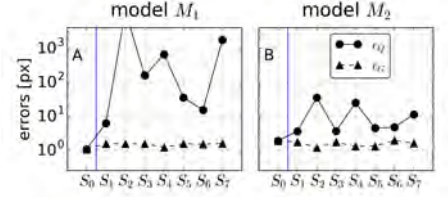

Intrinsic:  $k_{1*}$  and  $s_{c*}$

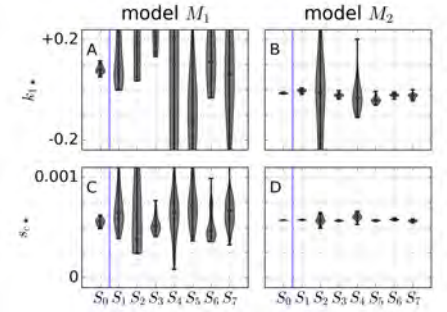

Errors  $\tilde{\epsilon}$  for model  $M_1$  (left panels) and model  $M_2$  (right panels)

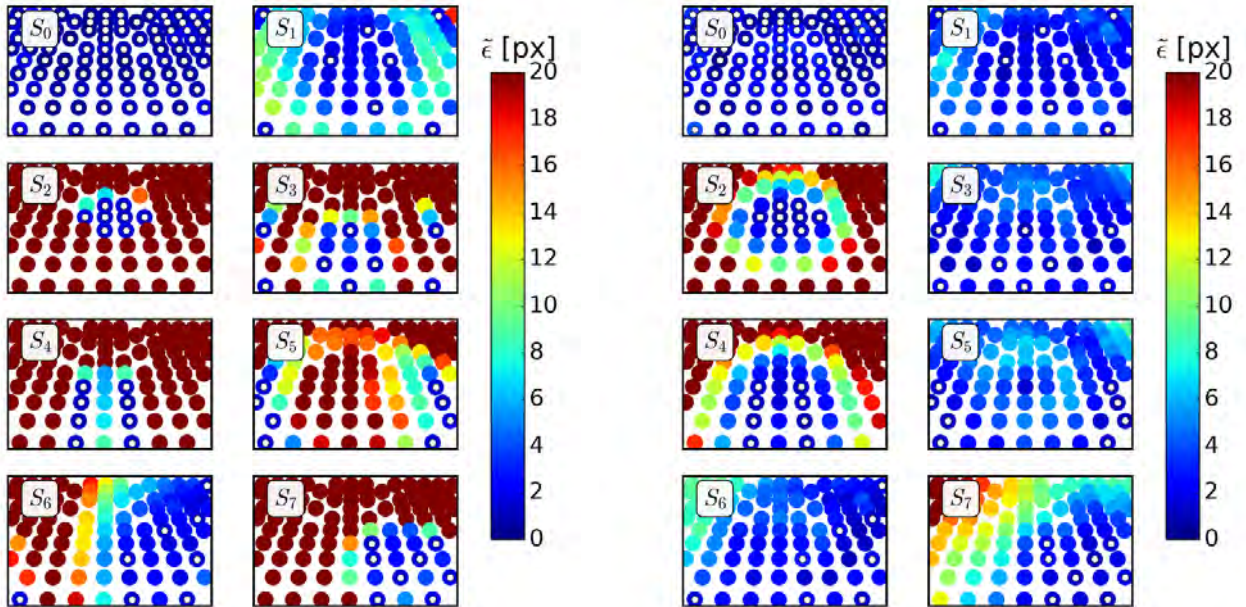



## Camera 2, 8 GCPs and angle $A_3$

Sets of points

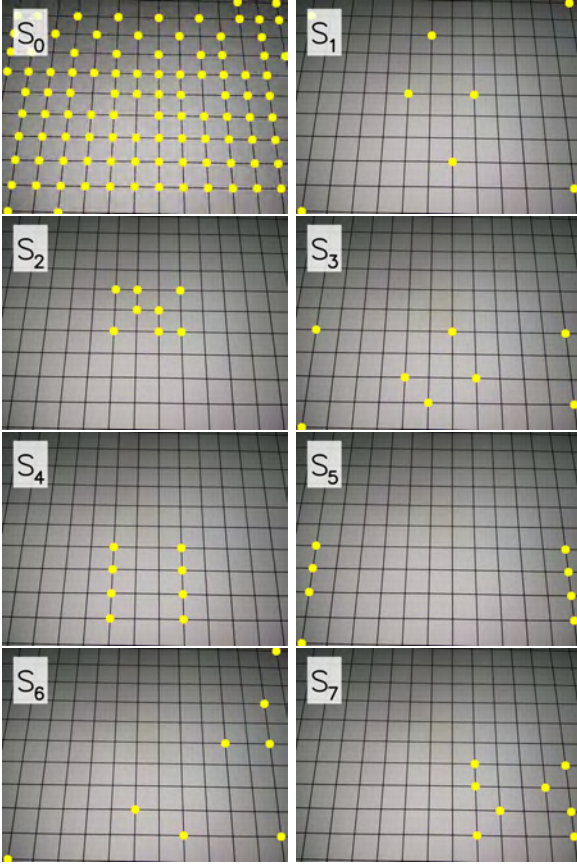

Errors  $\epsilon_P$

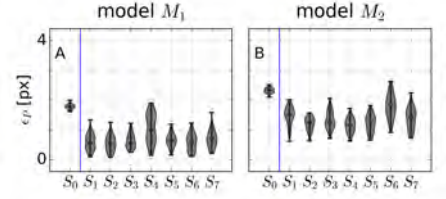

Errors  $\epsilon_Q$  and  $\epsilon_G$

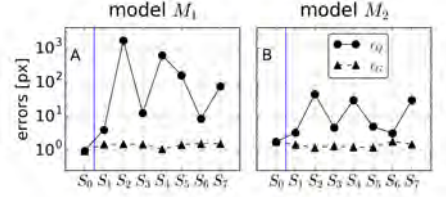

Intrinsic:  $k_{1*}$  and  $s_{c*}$

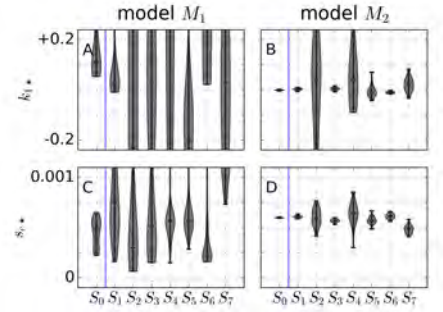

Errors  $\tilde{\epsilon}$  for model  $M_1$  (left panels) and model  $M_2$  (right panels)

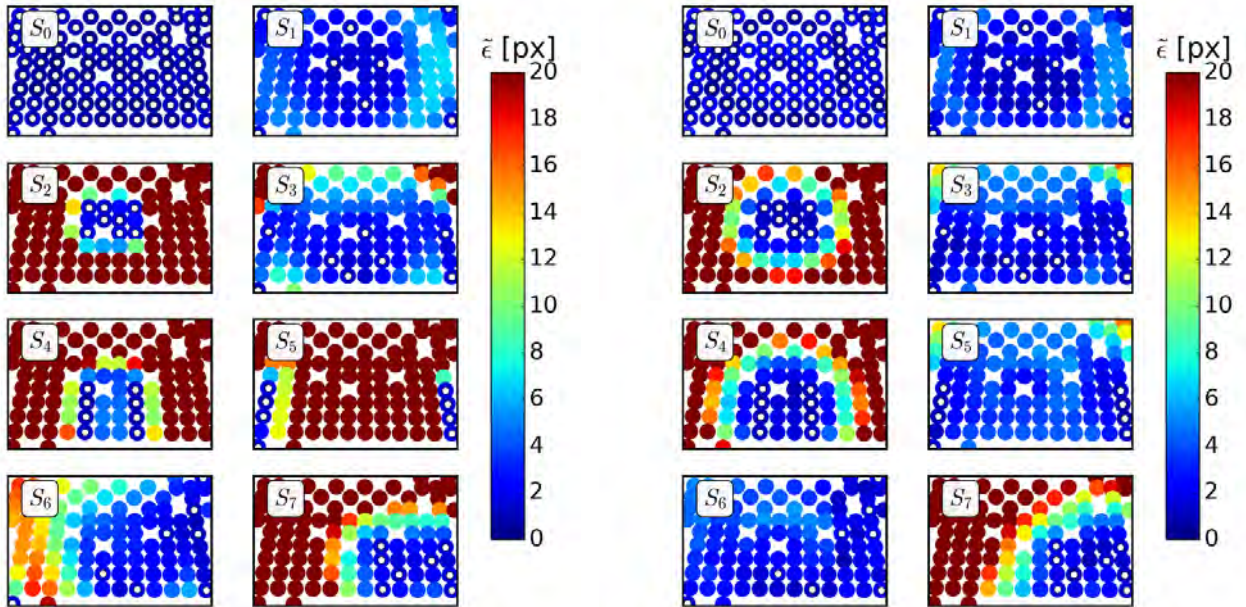

## Camera 2, 8 GCPs ( $A_1$ , $A_2$ and $A_3$ )

Extrinsic: eulerian angles for  $M_1$

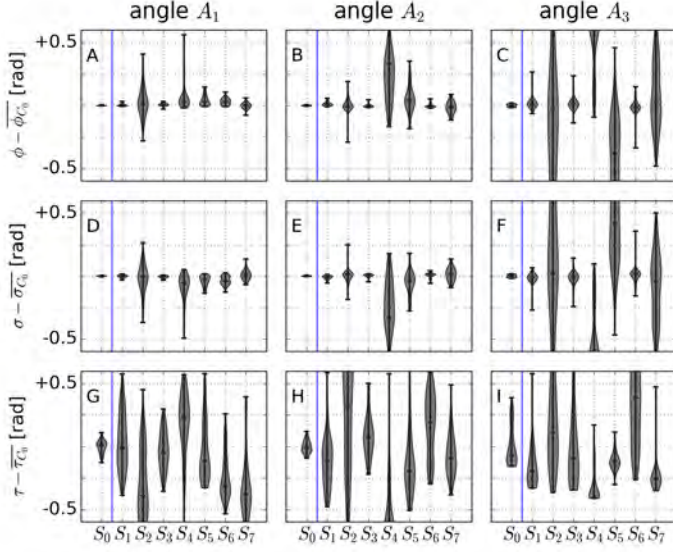

Extrinsic: eulerian angles for  $M_2$

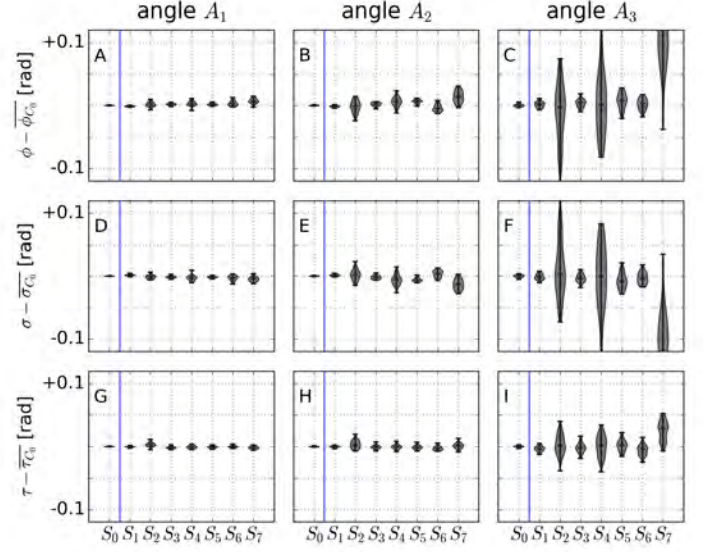

Extrinsic: camera position for  $M_1$

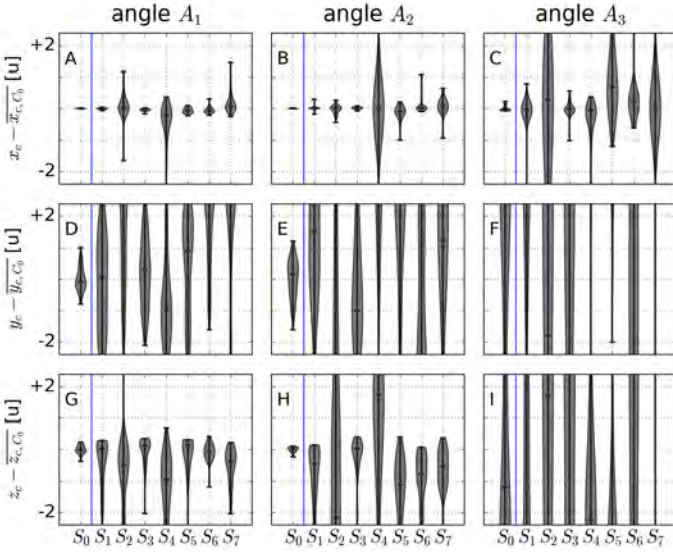

Extrinsic: camera position for  $M_2$

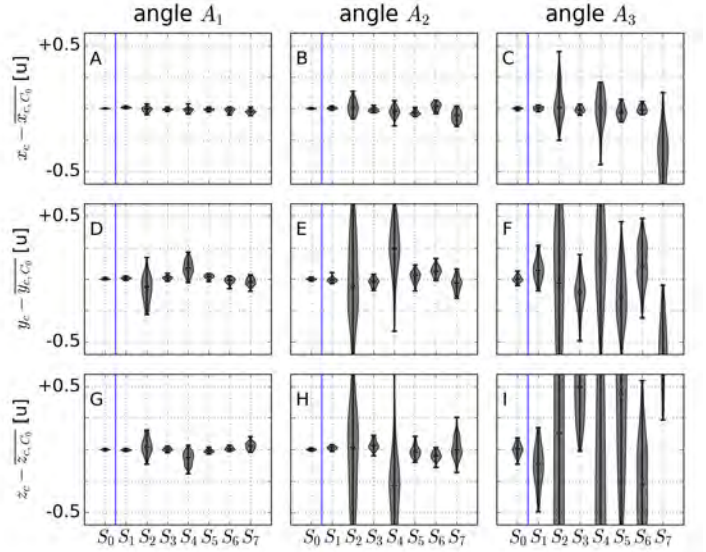



## Camera 2, 6 GCPs and angle $A_1$

Sets of points



Errors  $\epsilon_P$

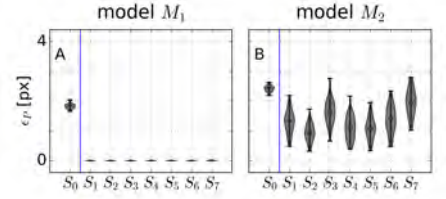

Errors  $\epsilon_Q$  and  $\epsilon_G$

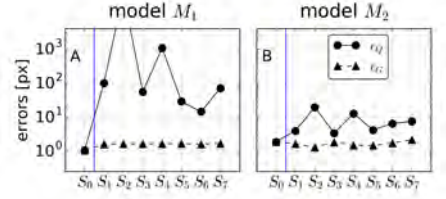

Intrinsic:  $k_{1\star}$  and  $s_{c\star}$

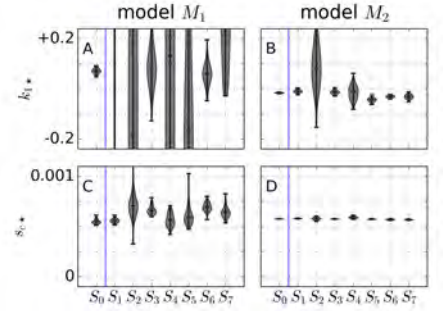

Errors  $\tilde{\epsilon}$  for model  $M_1$  (left panels) and model  $M_2$  (right panels)

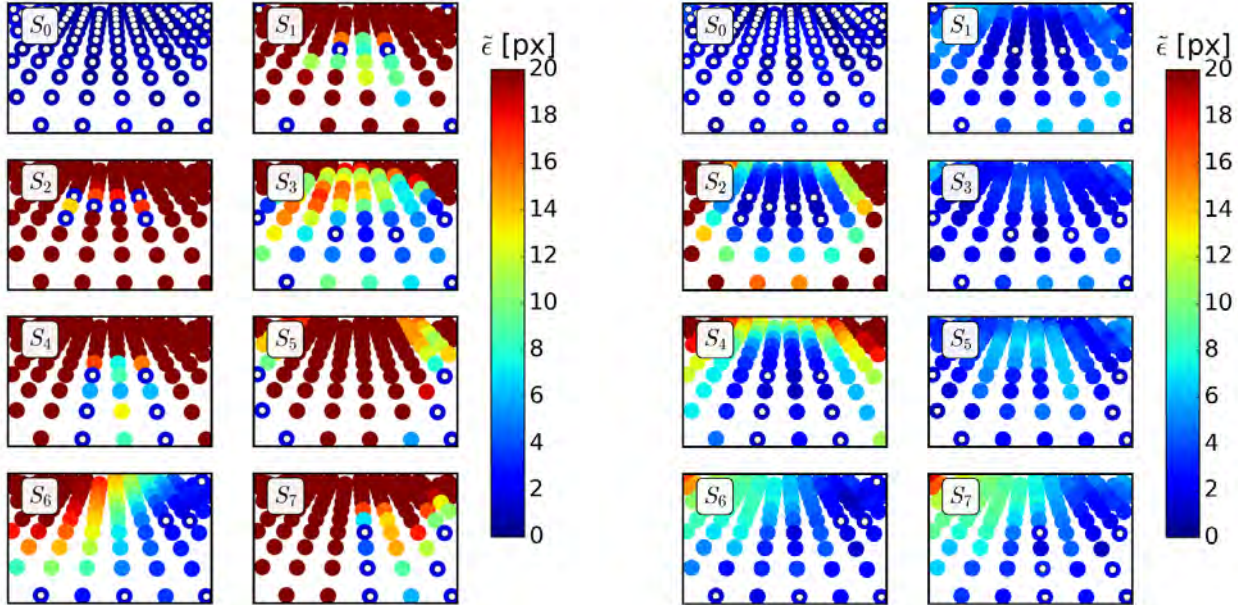

## Camera 2, 6 GCPs and angle $A_2$

Sets of points

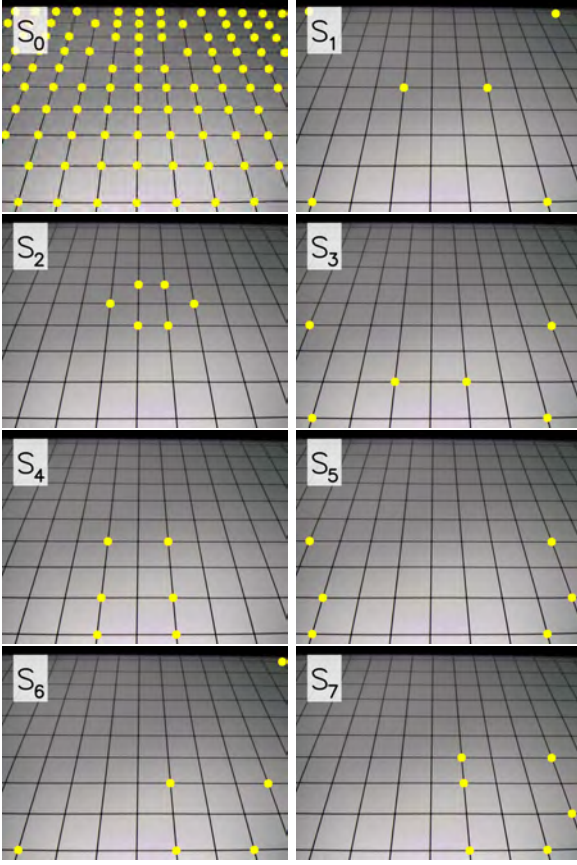

Errors  $\epsilon_P$

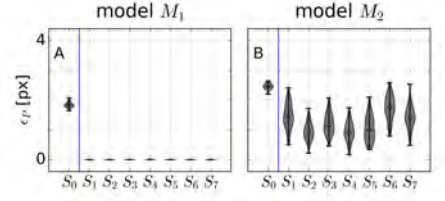

Errors  $\epsilon_Q$  and  $\epsilon_G$

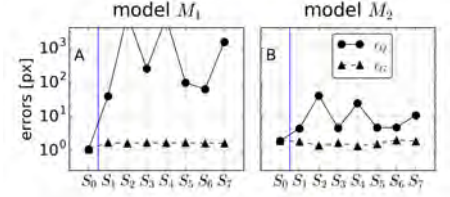

Intrinsic:  $k_{1*}$  and  $s_{c*}$

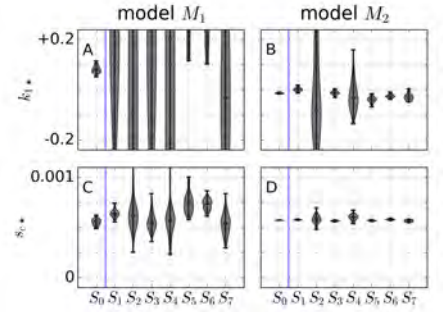

Errors  $\tilde{\epsilon}$  for model  $M_1$  (left panels) and model  $M_2$  (right panels)

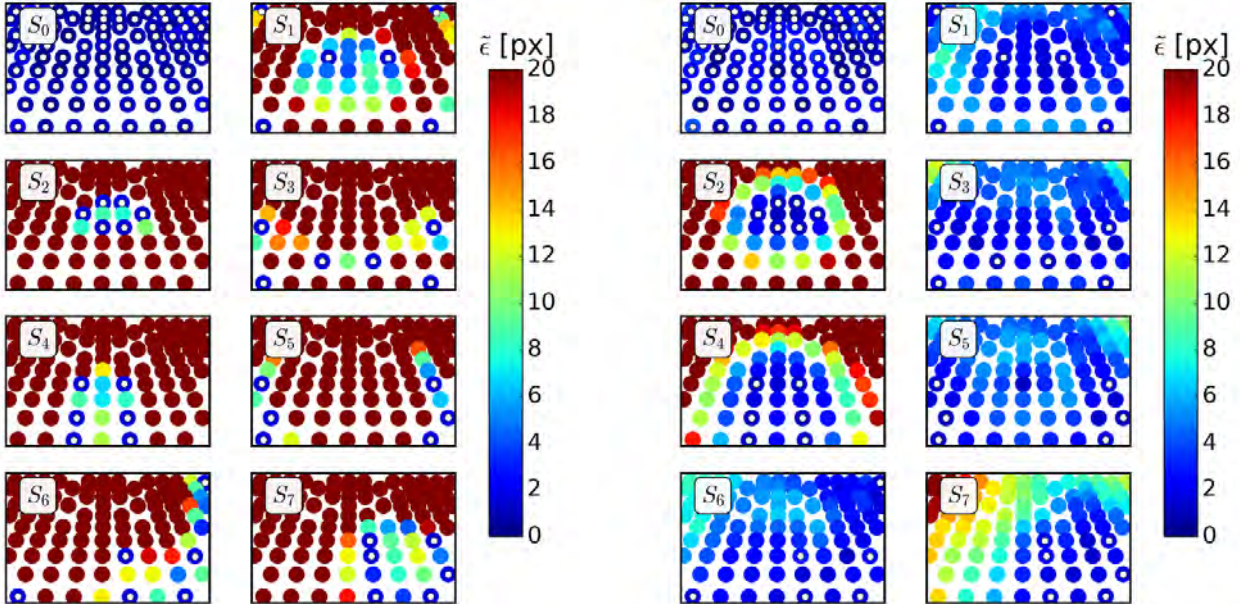



## Camera 2, 6 GCPs and angle $A_3$

Sets of points

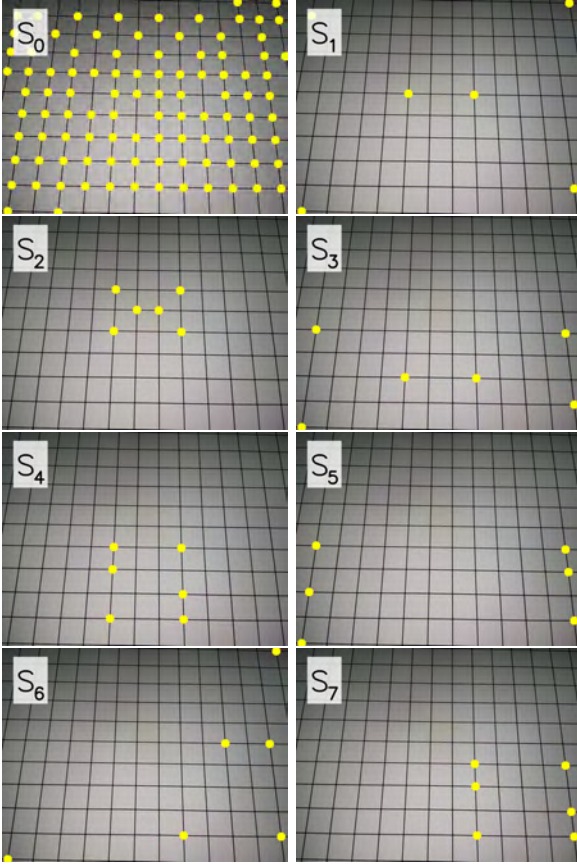

Errors  $\epsilon_P$

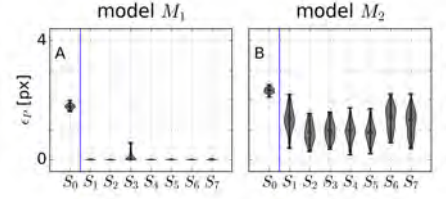

Errors  $\epsilon_Q$  and  $\epsilon_G$

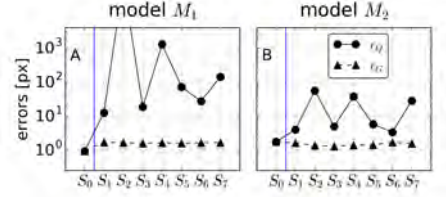

Intrinsic:  $k_{1*}$  and  $s_{c*}$

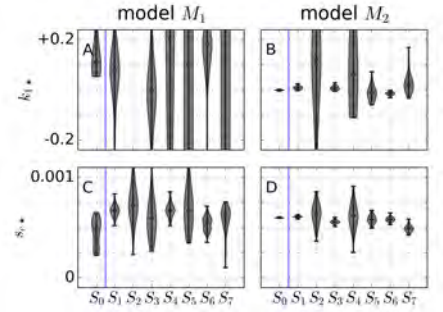

Errors  $\tilde{\epsilon}$  for model  $M_1$  (left panels) and model  $M_2$  (right panels)

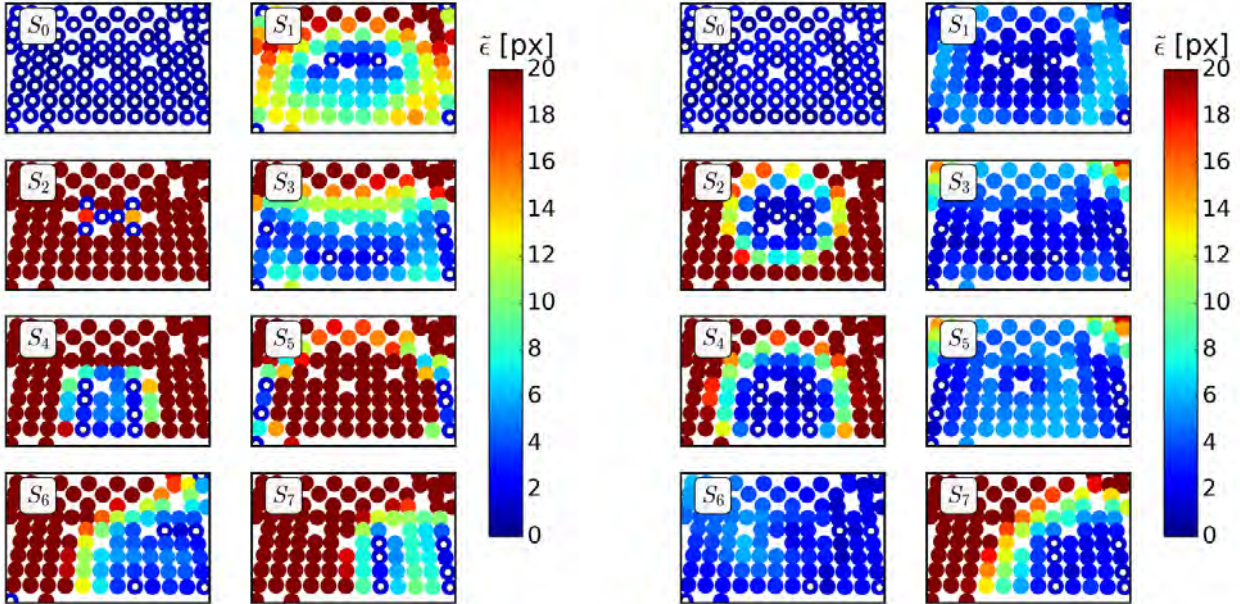

## Camera 2, 6 GCPs ( $A_1, A_2$ and $A_3$ )

Extrinsic: eulerian angles for  $M_1$

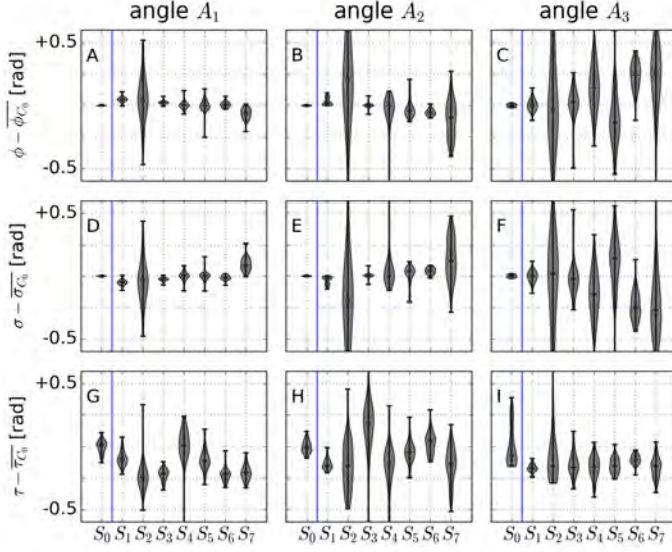

Extrinsic: eulerian angles for  $M_2$

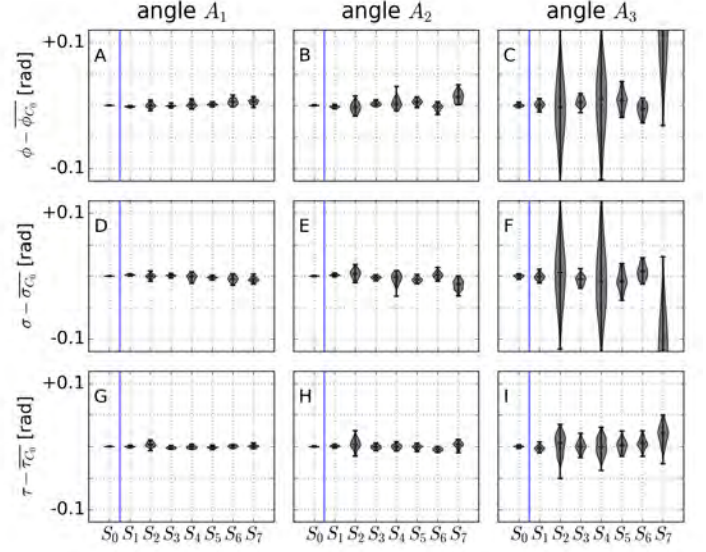

Extrinsic: camera position for  $M_1$

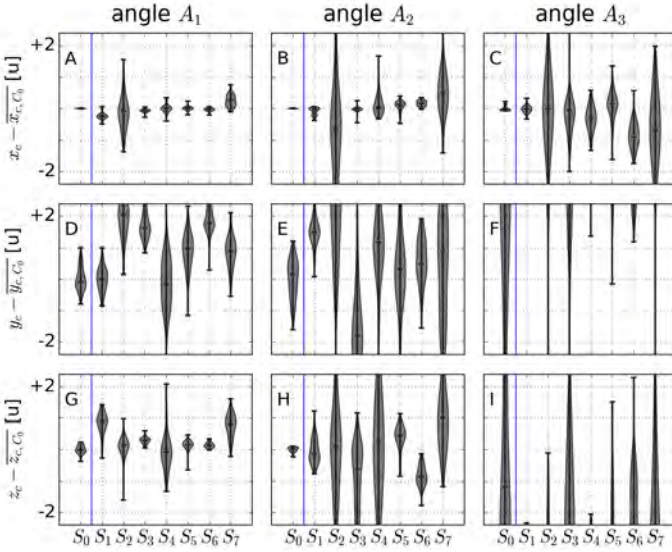

Extrinsic: camera position for  $M_2$

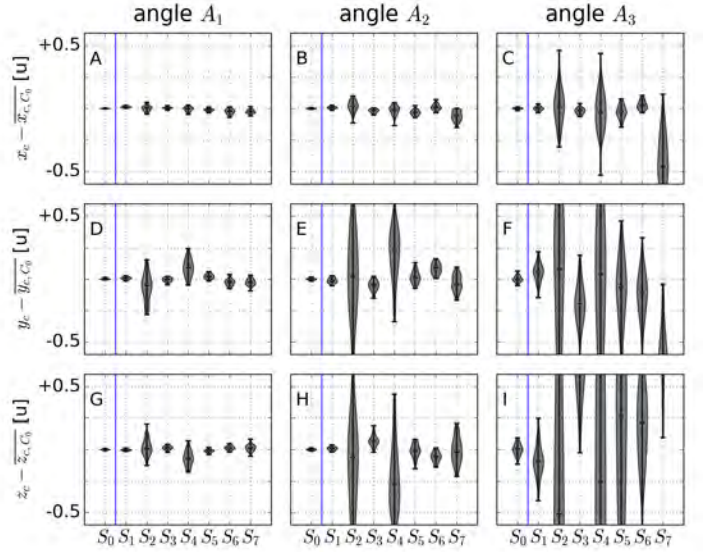

Supplement: s1 [file s1]
